# Supplementary material for: A catalogue of omics biological ageing clocks reveals substantial commonality and associations with disease risk
Source: publisher site journal article supplement (doi:10.18632/aging.203847), 2022-01-24
Supplement: Supplementary file [file aging-v14i2-203847-supplementary-material-SD6.pdf]

**Supplementary Table 4. ICD10 definitions.**

| <b>Block</b> | <b>Title</b>                                                                   |
|--------------|--------------------------------------------------------------------------------|
| J95-J99      | Other diseases of the respiratory system                                       |
| J90-J94      | Other diseases of pleura                                                       |
| J85-J86      | Suppurative and necrotic conditions of lower respiratory tract                 |
| J80-J84      | Other respiratory diseases principally affecting the interstitium              |
| J60-J70      | Lung diseases due to external agents                                           |
| J40-J47      | Chronic lower respiratory diseases                                             |
| J30-J39      | Other diseases of upper respiratory tract                                      |
| J20-J22      | Other acute lower respiratory infections                                       |
| J09-J18      | Influenza and pneumonia                                                        |
| J00-J06      | Acute respiratory infections                                                   |
| I95-I99      | Other and unspecified disorders of the circulatory system                      |
| I80-I89      | Diseases of veins, lymphatic vessels and lymph nodes, not elsewhere classified |
| I70-I79      | Diseases of arteries, arterioles and capillaries                               |
| I60-I69      | Cerebrovascular diseases                                                       |
| I30-I52      | Other forms of heart disease                                                   |
| I26-I28      | Pulmonary heart disease and diseases of pulmonary circulation                  |
| I20-I25      | Ischaemic heart diseases                                                       |
| I10-I15      | Hypertensive diseases                                                          |
| I05-I09      | Chronic rheumatic heart diseases                                               |
| E70-E90      | Metabolic disorders                                                            |
| E65-E68      | Obesity and other hyperalimentation                                            |
| E50-E64      | Other nutritional deficiencies                                                 |
| E20-E35      | Disorders of other endocrine glands                                            |
| E15-E16      | Other disorders of glucose regulation and pancreatic internal secretion        |
| E10-E14      | Diabetes mellitus                                                              |
| E00-E07      | Disorders of thyroid gland                                                     |
| C81-C96      | Malignant neoplasm of lymphoid, haematopoietic and related tissue              |
| C76-C80      | Malignant neoplasms of ill-defined, secondary and unspecified sites            |
| C73-C75      | Malignant neoplasms of thyroid and other endocrine glands                      |
| C69-C72      | Malignant neoplasms of eye, brain and other parts of central nervous system    |
| C64-C68      | Malignant neoplasm of urinary tract                                            |
| C60-C63      | Malignant neoplasms of male genital organs                                     |
| C51-C58      | Malignant neoplasms of female genital organs                                   |
| C50-C50      | Malignant neoplasm of breast                                                   |
| C45-C49      | Malignant neoplasms of mesothelial and soft tissue                             |
| C43-C44      | Melanoma and other malignant neoplasms of skin                                 |
| C30-C39      | Malignant neoplasm of respiratory and intrathoracic organs                     |
| C15-C26      | Malignant neoplasms of digestive organs                                        |
| C00-C14      | Malignant neoplasms of lip, oral cavity and pharynx                            |
