# Supplementary material for: A catalogue of omics biological ageing clocks reveals substantial commonality and associations with disease risk
Source: Aging (Albany NY). 2022 Jan 24;14(2):623–59. doi: 10.18632/aging.203847 (PMC8833109; doi:10.18632/aging.203847)
Supplement: Supplementary Table 5 [file aging-14-203847-s007.xlsx]

## Sheet: Age-Outcome Association
Supplementary Table 5. Summary of the association test between disease Outcome and Chronological age
For diseases, A Cox model was fitted with time since outset specifying the base hazard and age as a proportional hazard, with first occurrence of hospitalisation for any disease in the ICD-10 block as event. Prevalent cases at outset were excluded.
For quantitative traits, a linear model testing the effect of age on the outcome was tested. FEV1 and Cortisol were made negative to give traits which associate positively with age.
outcome	The quantitative trait or disease outcome under consideration. ICD blocks were analysed as a whole as were Chapters (single letters) for the sets of blocks considered, in which case first occurrence of any disease in the chapter was considered the event. ALL was defined as any disease in the chapters considered.
meaning_out	The ICD block for the outcome and its meaning.
clock	The omics clock defining age (in this case age = chronAge). This is also the score being tested.
method	The method by which age was measured. In this case at_vene=at venepuncture
submethod	NA
features	NA
n	The number of subjects included
trait	The dependent trait (the disease survival time after assessment)
cases	The number of cases observed
beta	The linear effect/ log e Cox hazard ratio effect for the hazard (age)
se	The SE of beta
z	the z-statistic for the test of association (=beta/se)
p	the one sided p-value for the test of positive association
trait_mean	The mean of the trait across the subjects in the analysis
trait_sd	The SD of the trait across the subjects in the analysis
q	The Benjamini-Hochberg FDR, allowing for all tests of age, within the disease and QT tables separately.
outcome	meaning_out	clock	method	submethod	features	n	trait	cases	beta	se	z	p	trait_mean	trait_sd	score_mean	score_sd	q
ALL	ALL	age	at_vene	all	full	1525	t	504	0.04919	0.00323	15.228	1.16e-52	8.06	3.43	50.9	14.9	4.86e-51
C	C	age	at_vene	all	full	1800	t	108	0.0608	0.00717	8.47	1.23e-17	9.65	2.37	52.3	15.1	4.66e-16
C00-C14	C00-C14 Malignant neoplasms of lip, oral cavity and pharynx	age	at_vene	all	full	1828	t	3	0.0515	0.0418	1.233	0.109	10.01	1.92	52.5	15.2	0.544
C15-C26	C15-C26 Malignant neoplasms of digestive organs	age	at_vene	all	full	1823	t	23	0.05483	0.0151	3.621	0.000147	9.94	2	52.5	15.2	0.00352
C30-C39	C30-C39 Malignant neoplasm of respiratory and intrathoracic organs	age	at_vene	all	full	1827	t	5	0.101	0.0352	2.869	0.00206	10	1.94	52.5	15.2	0.0309
C43-C44	C43-C44 Melanoma and other malignant neoplasms of skin	age	at_vene	all	full	1823	t	12	0.1052	0.0235	4.48	3.74e-06	9.97	1.98	52.5	15.2	0.000105
C45-C49	C45-C49 Malignant neoplasms of mesothelial and soft tissue	age	at_vene	all	full	1827	t	3	0.09262	0.0462	2.006	0.0224	10	1.92	52.5	15.2	0.202
C50-C50	C50-C50 Malignant neoplasm of breast	age	at_vene	all	full	1823	t	19	0.01466	0.0153	0.958	0.169	9.97	1.96	52.5	15.2	0.676
C51-C58	C51-C58 Malignant neoplasms of female genital organs	age	at_vene	all	full	1826	t	9	0.0619	0.0257	2.408	0.00802	9.97	1.98	52.5	15.2	0.0886
C60-C63	C60-C63 Malignant neoplasms of male genital organs	age	at_vene	all	full	1821	t	13	0.06228	0.0197	3.161	0.000785	9.97	1.98	52.5	15.2	0.0157
C64-C68	C64-C68 Malignant neoplasm of urinary tract	age	at_vene	all	full	1827	t	11	0.0683	0.0228	2.998	0.00136	9.98	1.95	52.5	15.2	0.0231
C69-C72	C69-C72 Malignant neoplasms of eye, brain and other parts of central nervous system	age	at_vene	all	full	1827	t	2	0.03038	0.0476	0.638	0.262	10.01	1.91	52.5	15.2	0.785
C73-C75	C73-C75 Malignant neoplasms of thyroid and other endocrine glands	age	at_vene	all	full	1828	t	2	0.0887	0.0581	1.527	0.0634	10.01	1.91	52.5	15.2	0.443
C76-C80	C76-C80 Malignant neoplasms of ill-defined, secondary and unspecified sites	age	at_vene	all	full	1825	t	39	0.05539	0.0117	4.737	1.08e-06	9.89	2.08	52.5	15.2	3.15e-05
C81-C96	C81-C96 Malignant neoplasm of lymphoid, haematopoietic and related tissue	age	at_vene	all	full	1828	t	17	0.0648	0.0183	3.552	0.000191	9.97	1.97	52.5	15.2	0.00421
E	E	age	at_vene	all	full	1755	t	223	0.056	0.00485	11.55	3.69e-31	9.29	2.74	52.2	15.2	1.51e-29
E00-E07	E00-E07 Disorders of thyroid gland	age	at_vene	all	full	1792	t	112	0.0439	0.00671	6.54	3.08e-11	9.65	2.41	52.4	15.2	9.54e-10
E10-E14	E10-E14 Diabetes mellitus	age	at_vene	all	full	1809	t	58	0.06558	0.00968	6.775	6.24e-12	9.84	2.16	52.4	15.2	2e-10
E15-E16	E15-E16 Other disorders of glucose regulation and pancreatic internal secretion	age	at_vene	all	full	1827	t	4	0.1354	0.0452	2.996	0.00137	10	1.92	52.5	15.2	0.0231
E20-E35	E20-E35 Disorders of other endocrine glands	age	at_vene	all	full	1827	t	4	0.05619	0.0371	1.516	0.0648	10	1.92	52.5	15.2	0.443
E50-E64	E50-E64 Other nutritional deficiencies	age	at_vene	all	full	1828	t	10	0.07572	0.0244	3.097	0.000977	9.99	1.93	52.5	15.2	0.0186
E65-E68	E65-E68 Obesity and other hyperalimentation	age	at_vene	all	full	1825	t	23	0.03227	0.0143	2.253	0.0121	9.96	2	52.5	15.2	0.121
E70-E90	E70-E90 Metabolic disorders	age	at_vene	all	full	1805	t	68	0.0742	0.0093	7.979	7.38e-16	9.81	2.17	52.4	15.2	2.73e-14
I	I	age	at_vene	all	full	1625	t	377	0.05909	0.00379	15.607	3.24e-55	8.7	3.09	51.2	15	1.39e-53
I05-I09	I05-I09 Chronic rheumatic heart diseases	age	at_vene	all	full	1827	t	15	0.07885	0.0192	4.106	2.01e-05	9.98	1.93	52.5	15.2	0.000543
I10-I15	I10-I15 Hypertensive diseases	age	at_vene	all	full	1734	t	261	0.0713	0.00456	15.644	1.82e-55	9.13	2.81	51.7	15	8.01e-54
I20-I25	I20-I25 Ischaemic heart diseases	age	at_vene	all	full	1787	t	108	0.0771	0.00752	10.261	5.28e-25	9.65	2.37	52.2	15.1	2.06e-23
I26-I28	I26-I28 Pulmonary heart disease and diseases of pulmonary circulation	age	at_vene	all	full	1826	t	18	0.04384	0.0168	2.616	0.00444	9.97	1.94	52.5	15.2	0.0622
I30-I52	I30-I52 Other forms of heart disease	age	at_vene	all	full	1796	t	135	0.0733	0.00639	11.475	8.81e-31	9.65	2.29	52.3	15.1	3.52e-29
I60-I69	I60-I69 Cerebrovascular diseases	age	at_vene	all	full	1822	t	39	0.0862	0.0125	6.88	2.99e-12	9.93	2.01	52.5	15.2	9.88e-11
I70-I79	I70-I79 Diseases of arteries, arterioles and capillaries	age	at_vene	all	full	1818	t	24	0.0529	0.0147	3.596	0.000162	9.94	2	52.5	15.2	0.00372
I80-I89	I80-I89 Diseases of veins, lymphatic vessels and lymph nodes, not elsewhere classified	age	at_vene	all	full	1757	t	92	0.01105	0.00686	1.612	0.0534	9.71	2.32	52.3	15.3	0.427
I95-I99	I95-I99 Other and unspecified disorders of the circulatory system	age	at_vene	all	full	1826	t	24	0.08185	0.0158	5.176	1.13e-07	9.97	1.94	52.5	15.2	3.4e-06
J	J	age	at_vene	all	full	1747	t	205	0.03701	0.00491	7.538	2.39e-14	9.4	2.58	52.4	15.2	8.61e-13
J00-J06	J00-J06 Acute respiratory infections	age	at_vene	all	full	1822	t	15	-0.02544	0.0169	-1.505	0.934	9.97	1.98	52.6	15.2	0.934
J09-J18	J09-J18 Influenza and pneumonia	age	at_vene	all	full	1826	t	42	0.08304	0.0119	6.968	1.61e-12	9.93	1.98	52.5	15.2	5.48e-11
J20-J22	J20-J22 Other acute lower respiratory infections	age	at_vene	all	full	1815	t	47	0.07864	0.0112	7.037	9.79e-13	9.91	2.02	52.4	15.2	3.43e-11
J30-J39	J30-J39 Other diseases of upper respiratory tract	age	at_vene	all	full	1801	t	33	0.00199	0.0114	0.175	0.431	9.91	2.06	52.6	15.2	0.861
J40-J47	J40-J47 Chronic lower respiratory diseases	age	at_vene	all	full	1790	t	98	0.02297	0.00682	3.366	0.000382	9.7	2.32	52.4	15.2	0.00801
J60-J70	J60-J70 Lung diseases due to external agents	age	at_vene	all	full	1825	t	13	0.05117	0.0199	2.575	0.00501	9.98	1.94	52.5	15.2	0.0651
J80-J84	J80-J84 Other respiratory diseases principally affecting the interstitium	age	at_vene	all	full	1828	t	12	0.08923	0.0228	3.921	4.41e-05	9.98	1.95	52.5	15.2	0.00115
J85-J86	J85-J86 Suppurative and necrotic conditions of lower respiratory tract	age	at_vene	all	full	1828	t	2	0.1359	0.0558	2.438	0.00738	10	1.92	52.5	15.2	0.0886
J90-J94	J90-J94 Other diseases of pleura	age	at_vene	all	full	1822	t	18	0.0675	0.0179	3.777	7.93e-05	9.98	1.94	52.5	15.2	0.00198
J95-J99	J95-J99 Other diseases of the respiratory system	age	at_vene	all	full	1828	t	15	0.05661	0.0187	3.032	0.00121	9.97	1.96	52.5	15.2	0.0219
BMI	BMI	age	at_vene	all	NA	1905	bmi	NA	0.01513	0.001484	10.2	9.82e-25	6.066	1	53.4	15	4.91e-24
BP_SYS	Systolic BP	age	at_vene	all	NA	1910	bp_sys	NA	0.03472	0.00127	27.35	5.94e-165	7.299	1	53.2	15	3.57e-164
CORTISO	Cortisol	age	at_vene	all	NA	1947	cortisol_nmol_l	NA	0.00947	0.00149	6.35	1.06e-10	-2.753	1	53.6	15.1	2.11e-10
CREAT	Creatinine	age	at_vene	all	NA	1979	creat	NA	0.00916	0.001231	7.44	5.19e-14	4.84	1	52.9	15.2	1.56e-13
CRP	CRP	age	at_vene	all	NA	1895	crp	NA	0.00896	0.001498	5.98	1.13e-09	0.952	1	53.2	15.1	1.13e-09
FEV1	FEV1	age	at_vene	all	NA	1837	fev1	NA	0.04133	0.00088	46.97	0	-3.461	1	53.4	15	0
TOTCHOL	Total Cholesterol	age	at_vene	all	NA	1994	totchol	NA	0.01115	0.001443	7.73	5.25e-15	4.826	1	53.1	15.3	2.1e-14

## Sheet: OCAA-Outcome Association
Supplementary Table 5. Summary of the association test between outcome and OCAA.
For diseases, A Cox model was fitted with time since outset specifying the base hazard and age as a proportional hazard, with first occurrence of hospitalisation for any disease in the ICD-10 block as event. Prevalent cases at outset were excluded.
For quantitative traits, a linear model testing the effect of age on the outcome was tested. FEV1 Nd Cortisol were made negative to give traits which associate positively with age.
Outcome	The quantitative trait or disease outcome under consideration. ICD blocks were analysed as a whole as were Chapters (single letters) for the sets of blocks considered, in which case first occurrence of any disease in the chapter was considered the event. ALL was defined as any disease in the chapters considered.
Outcome Description	The ICD block for the outcome and its meaning.
Clock	The omics clock defining biological age . This is also the score being tested.
n	The number of subjects included
trait	The dependent trait /the disease survival time after assessment
cases	The number of cases observed
beta	The linear effect/ log e Cox hazard ratio effect for the hazard (age)
se	The SE of beta
z	the z-statistic for the test of association (=beta/se)
p	the one sided p-value for the test of positive association
trait_sd	The SD of the trait across the subjects in the analysis
q	The Benjamini-Hochberg FDR, allowing for all tests of age, within the disease and QT tables separately.
Clock	Outcome	Outcome Description	n	trait	cases	beta	se	z	p	trait_mean	trait_sd	score_mean	score_sd	q
Horvath 2013	CREAT	Creatinine	1035	creat	NA	0.25251	0.4255	0.6559	0.256	591.4	109.2	-0.02	5.96	1
DEXA	FEV1	FEV1	1096	fev1	NA	0.2082	0.0539	3.8707	5.43e-05	-85.4	24.2	0.07554	10.01	0.0045
GlycanAge	CRP	CRP	1850	crp	NA	1.72776	0.3178	5.72932	5.04e-09	106.6	111.6	-0.09686	10.12	4.49e-07
MetaboAge	FEV1	FEV1	1774	fev1	NA	0.01817	0.0185	0.9846	0.162	-83.9	24.2	-15.2503	20.59	1
DNAme Horvath CpGs	BP_SYS	Systolic BP	924	bp_sys	NA	-0.16664	0.1864	-0.9093	0.818	213.1	28.8	0.29417	4.38	1
UPLC IgG Glycomics	BMI	BMI	1837	bmi	NA	0.83781	0.1959	4.3618	6.45e-06	401.3	66.1	-0.14806	9.51	0.000542
UPLC IgG Glycomics	CRP	CRP	1833	crp	NA	1.472	0.3239	4.80736	7.65e-07	106.6	111.6	-0.10598	9.61	6.58e-05
Horvath 2013	BP_SYS	Systolic BP	1017	bp_sys	NA	-0.19265	0.1233	-1.5753	0.942	210.6	28.8	0.05836	5.98	1
MS Complex Lipidomics	CORTISO	Cortisol	920	cortisol_nmol_l	NA	1.30028	0.453	3.2206	0.00064	-311.4	105.6	0.33783	9.41	0.0499
MS Metabolomics	CORTISO	Cortisol	843	cortisol_nmol_l	NA	0.96929	0.5212	2.1784	0.0147	-310.5	105.6	0.00257	7.03	0.955
GlycanAge	BP_SYS	Systolic BP	1865	bp_sys	NA	0.14351	0.0718	2.0043	0.0225	207.8	28.8	-0.07734	10.06	1
DNAme Hannum CpGs	CREAT	Creatinine	1019	creat	NA	0.67913	0.5837	1.4335	0.0759	595.4	109.2	0.185	4.09	1
MetaboAge	BP_SYS	Systolic BP	1854	bp_sys	NA	-0.00224	0.0331	-0.0677	0.527	209	28.8	-15.0135	20.41	1
PEA Proteomics	BMI	BMI	782	bmi	NA	0.23268	0.5047	0.5341	0.297	402.1	66.1	-0.05913	4.18	1
DNAme Horvath CpGs	CREAT	Creatinine	943	creat	NA	0.54146	0.5817	1.1443	0.126	594.7	109.2	0.262	4.38	1
NMR Metabolomics	CORTISO	Cortisol	1607	cortisol_nmol_l	NA	0.27747	0.3427	0.8619	0.194	-286.1	105.6	-0.09718	9.98	1
MS Fatty Acid Lipidomics	FEV1	FEV1	937	fev1	NA	-0.09291	0.0677	-1.3749	0.915	-87.7	24.2	0.3425	13.41	1
MS Complex Lipidomics	CRP	CRP	875	crp	NA	0.8806	0.4901	2.06143	0.0196	109.3	111.6	0.25709	9.4	1
MS Fatty Acid Lipidomics	CRP	CRP	886	crp	NA	-0.66031	0.4864	-1.55311	0.94	109.4	111.6	0.08024	13.35	1
UPLC IgG Glycomics	BP_SYS	Systolic BP	1845	bp_sys	NA	0.2188	0.0733	2.9921	0.00139	207.8	28.8	-0.04865	9.51	0.0997
MS Metabolomics	CREAT	Creatinine	858	creat	NA	0.24732	0.4555	0.61	0.271	593.5	109.2	0.0408	7.05	1
DNAme Horvath CpGs	TOTCHOL	Total Cholesterol	952	totchol	NA	0.83694	0.5692	1.7886	0.0368	439.9	89.7	0.2221	4.42	1
MetaboAge	CRP	CRP	1838	crp	NA	0.19131	0.1508	1.28397	0.0996	106.6	111.6	-14.9486	20.51	1
MS Fatty Acid Lipidomics	BP_SYS	Systolic BP	943	bp_sys	NA	0.27037	0.1144	2.3784	0.00869	210.6	28.8	0.51553	13.37	0.582
NMR Metabolomics	CRP	CRP	1553	crp	NA	2.47971	0.3614	7.35783	9.35e-14	105.4	111.6	-0.1246	10.01	8.41e-12
Horvath 2013	TOTCHOL	Total Cholesterol	1044	totchol	NA	0.48934	0.4165	1.292	0.0982	440.9	89.7	-0.02966	5.95	1
DNAme Hannum CpGs	FEV1	FEV1	991	fev1	NA	0.03047	0.1089	0.2828	0.389	-86.9	24.2	0.23153	4.09	1
Mega Omics	CORTISO	Cortisol	781	cortisol_nmol_l	NA	0.49562	0.8118	1.0456	0.148	-311.8	105.6	0.03849	2.83	1
Mega Omics	BP_SYS	Systolic BP	787	bp_sys	NA	0.87621	0.2993	3.0688	0.00107	210.6	28.8	0.06364	2.83	0.0806
GlycanAge	CORTISO	Cortisol	1909	cortisol_nmol_l	NA	-0.35556	0.2978	-1.2502	0.894	-284.4	105.6	-0.10037	10.13	1
PEA Proteomics	FEV1	FEV1	778	fev1	NA	0.39518	0.1238	3.2284	0.000622	-87	24.2	-0.04142	4.2	0.0492
DEXA	BP_SYS	Systolic BP	1110	bp_sys	NA	0.30337	0.0995	3.0615	0.0011	213.1	28.8	0.08073	10.07	0.0815
MS Complex Lipidomics	BMI	BMI	930	bmi	NA	0.47147	0.2956	1.6697	0.0475	408.5	66.1	0.3101	9.46	1
Horvath 2013	CRP	CRP	972	crp	NA	0.52663	0.5105	1.19965	0.115	109.9	111.6	-0.0534	5.99	1
GlycanAge	FEV1	FEV1	1784	fev1	NA	0.107	0.0412	2.5965	0.00471	-83.9	24.2	-0.18779	10.01	0.334
MS Metabolomics	CRP	CRP	805	crp	NA	0.70053	0.5524	1.52123	0.0641	108.8	111.6	-0.18611	7.06	1
MS Complex Lipidomics	BP_SYS	Systolic BP	931	bp_sys	NA	0.08526	0.113	0.759	0.224	211.8	28.8	0.45806	9.47	1
DEXA	CRP	CRP	1091	crp	NA	1.25683	0.4219	3.28635	0.000507	109.2	111.6	0.13295	10.2	0.0406
GlycanAge	TOTCHOL	Total Cholesterol	1945	totchol	NA	0.32755	0.2547	1.33	0.0918	432.7	89.7	-0.01313	10.15	1
Mega Omics	BMI	BMI	788	bmi	NA	0.62705	0.6517	1.2685	0.102	406.1	66.1	0.02197	2.8	1
Hannum 2013	FEV1	FEV1	1008	fev1	NA	0.09533	0.0848	1.1259	0.13	-86.9	24.2	-0.00201	5.07	1
DNAme Hannum CpGs	BP_SYS	Systolic BP	1000	bp_sys	NA	-0.24299	0.1856	-1.3318	0.909	210.6	28.8	0.20869	4.11	1
NMR Metabolomics	BP_SYS	Systolic BP	1625	bp_sys	NA	0.2525	0.0815	3.1097	0.000936	211.4	28.8	0.09142	10.12	0.0712
DNAme Hannum CpGs	BMI	BMI	996	bmi	NA	0.77863	0.4557	1.9198	0.0274	403.9	66.1	0.14105	4.1	1
DEXA	CORTISO	Cortisol	1123	cortisol_nmol_l	NA	0.01736	0.3975	0.0476	0.481	-288.5	105.6	0.04287	10.11	1
MS Fatty Acid Lipidomics	CORTISO	Cortisol	933	cortisol_nmol_l	NA	0.04929	0.4566	0.1213	0.452	-313.1	105.6	0.15188	13.27	1
MetaboAge	CORTISO	Cortisol	1898	cortisol_nmol_l	NA	-0.2659	0.1427	-1.8834	0.97	-284.2	105.6	-15.0573	20.35	1
MetaboAge	BMI	BMI	1846	bmi	NA	0.19284	0.0885	2.1872	0.0144	400.4	66.1	-15.178	20.45	0.948
Horvath 2013	CORTISO	Cortisol	1025	cortisol_nmol_l	NA	0.11486	0.4775	0.2737	0.392	-307.2	105.6	0.04973	5.92	1
GlycanAge	BMI	BMI	1857	bmi	NA	0.70924	0.192	3.7648	8.33e-05	400.4	66.1	-0.17619	10.03	0.00683
UPLC IgG Glycomics	TOTCHOL	Total Cholesterol	1926	totchol	NA	0.9199	0.2594	3.671	0.000121	433.7	89.7	-0.03362	9.6	0.00978
DEXA	TOTCHOL	Total Cholesterol	1145	totchol	NA	1.00389	0.3386	3.1506	0.000815	445.1	89.7	0.1926	10.18	0.0627
MS Metabolomics	FEV1	FEV1	846	fev1	NA	0.05974	0.0793	0.7547	0.225	-89	24.2	0.05757	7.04	1
UPLC IgG Glycomics	FEV1	FEV1	1766	fev1	NA	0.07412	0.0418	1.7735	0.0381	-84.4	24.2	-0.14021	9.48	1
DNAme Horvath CpGs	CORTISO	Cortisol	931	cortisol_nmol_l	NA	0.57037	0.6351	1.1626	0.122	-307.2	105.6	0.24119	4.41	1
MS Metabolomics	BMI	BMI	851	bmi	NA	0.62237	0.3492	1.902	0.0286	407	66.1	-0.01834	7	1
Mega Omics	TOTCHOL	Total Cholesterol	794	totchol	NA	1.26564	0.7605	2.5631	0.00519	448.3	89.7	0.05882	2.83	0.363
MS Fatty Acid Lipidomics	CREAT	Creatinine	940	creat	NA	-0.46683	0.4064	-1.2582	0.896	586.6	109.2	0.459	13.41	1
PEA Proteomics	CRP	CRP	743	crp	NA	0.00267	0.7287	0.00532	0.498	110.4	111.6	-0.03496	4.15	1
PEA Proteomics	CREAT	Creatinine	797	creat	NA	2.1698	0.6285	4.4369	4.56e-06	599.6	109.2	-0.035	4.18	0.000388
PEA Proteomics	TOTCHOL	Total Cholesterol	803	totchol	NA	0.85428	0.6253	1.7506	0.04	440.9	89.7	-0.02418	4.18	1
Hannum 2013	BMI	BMI	1013	bmi	NA	0.06631	0.3702	0.1927	0.424	404.8	66.1	0.00546	5.07	1
Mega Omics	FEV1	FEV1	783	fev1	NA	0.36467	0.1778	2.0852	0.0185	-87.8	24.2	0.06077	2.84	1
Horvath 2013	FEV1	FEV1	1008	fev1	NA	-0.00191	0.0711	-0.027	0.511	-86.9	24.2	0.05071	5.99	1
DNAme Hannum CpGs	CORTISO	Cortisol	1007	cortisol_nmol_l	NA	1.47914	0.6334	3.0179	0.00127	-306.8	105.6	0.1922	4.13	0.0929
MS Complex Lipidomics	CREAT	Creatinine	930	creat	NA	-0.57637	0.3961	-1.5838	0.943	586.6	109.2	0.415	9.5	1
Horvath 2013	BMI	BMI	1013	bmi	NA	0.46751	0.3172	1.5546	0.06	404.8	66.1	0.0419	5.97	1
NMR Metabolomics	FEV1	FEV1	1555	fev1	NA	0.08446	0.0461	1.8339	0.0333	-85.2	24.2	-0.026	10.12	1
GlycanAge	CREAT	Creatinine	1933	creat	NA	0.32843	0.2617	1.2995	0.0969	524.9	109.2	0.0607	10.15	1
DNAme Horvath CpGs	FEV1	FEV1	917	fev1	NA	0.1496	0.1071	1.4052	0.08	-87.1	24.2	0.31333	4.37	1
PEA Proteomics	CORTISO	Cortisol	789	cortisol_nmol_l	NA	1.26322	0.6856	2.531	0.00569	-315.6	105.6	-0.03147	4.17	0.392
PEA Proteomics	BP_SYS	Systolic BP	781	bp_sys	NA	-0.05369	0.212	-0.2591	0.602	211.4	28.8	-0.0182	4.18	1
DNAme Hannum CpGs	CRP	CRP	956	crp	NA	0.0759	0.6723	0.15249	0.439	109.9	111.6	0.15527	4.09	1
UPLC IgG Glycomics	CREAT	Creatinine	1913	creat	NA	0.3761	0.2667	1.4639	0.0716	524.9	109.2	0.0444	9.6	1
NMR Metabolomics	BMI	BMI	1621	bmi	NA	1.13081	0.2167	5.3454	4.51e-08	405.2	66.1	-0.0589	10.06	3.97e-06
Mega Omics	CREAT	Creatinine	792	creat	NA	2.48797	0.7613	5.0403	2.32e-07	600	109.2	0.0451	2.83	2.02e-05
Hannum 2013	BP_SYS	Systolic BP	1017	bp_sys	NA	-0.38502	0.1463	-2.6599	0.996	210.6	28.8	0.03748	5.06	1
Hannum 2013	CRP	CRP	972	crp	NA	0.172	0.5969	0.35923	0.36	109.9	111.6	-0.03919	4.86	1
Hannum 2013	TOTCHOL	Total Cholesterol	1044	totchol	NA	-0.01418	0.4816	-0.0336	0.513	440.9	89.7	-0.00127	5.02	1
DNAme Horvath CpGs	BMI	BMI	921	bmi	NA	1.02262	0.454	2.528	0.00574	401.3	66.1	0.22481	4.36	0.392
UPLC IgG Glycomics	CORTISO	Cortisol	1889	cortisol_nmol_l	NA	-0.17969	0.3035	-0.621	0.733	-284.9	105.6	-0.10426	9.6	1
DEXA	CREAT	Creatinine	1139	creat	NA	-1.31694	0.3519	-3.9988	1	547.9	109.2	0.322	10.12	1
DNAme Horvath CpGs	CRP	CRP	888	crp	NA	0.79149	0.6679	1.59253	0.0556	109.9	111.6	0.1577	4.4	1
Hannum 2013	CORTISO	Cortisol	1025	cortisol_nmol_l	NA	0.99069	0.5414	2.1763	0.0148	-307.2	105.6	0.07188	5.04	0.955
Mega Omics	CRP	CRP	741	crp	NA	0.20306	0.8386	0.44445	0.328	109.4	111.6	0.04777	2.83	1
Hannum 2013	CREAT	Creatinine	1035	creat	NA	-0.02968	0.493	-0.0692	0.528	591.4	109.2	0.0163	5	1
DNAme Hannum CpGs	TOTCHOL	Total Cholesterol	1027	totchol	NA	0.90308	0.5716	1.9255	0.0271	439.9	89.7	0.15234	4.11	1
MS Fatty Acid Lipidomics	BMI	BMI	942	bmi	NA	0.40919	0.2972	1.4424	0.0746	401.3	66.1	0.3004	13.46	1
MS Metabolomics	BP_SYS	Systolic BP	854	bp_sys	NA	0.13368	0.1363	0.9909	0.161	210.2	28.8	0.0854	7.04	1
MS Complex Lipidomics	FEV1	FEV1	923	fev1	NA	0.12959	0.0657	1.9788	0.0239	-87.6	24.2	0.41289	9.45	1
DEXA	NA	BMI	NA	NA	NA	NA	NA	NA	NA	NA	NA	NA	NA	NA
NMR Metabolomics	NA	Creatinine	NA	NA	NA	NA	NA	NA	NA	NA	NA	NA	NA	NA
MetaboAge	NA	Creatinine	NA	NA	NA	NA	NA	NA	NA	NA	NA	NA	NA	NA
NMR Metabolomics	NA	Total Cholesterol	NA	NA	NA	NA	NA	NA	NA	NA	NA	NA	NA	NA
MetaboAge	NA	Total Cholesterol	NA	NA	NA	NA	NA	NA	NA	NA	NA	NA	NA	NA
MS Metabolomics	NA	Total Cholesterol	NA	NA	NA	NA	NA	NA	NA	NA	NA	NA	NA	NA
MS Complex Lipidomics	NA	Total Cholesterol	NA	NA	NA	NA	NA	NA	NA	NA	NA	NA	NA	NA
MS Fatty Acid Lipidomics	NA	Total Cholesterol	NA	NA	NA	NA	NA	NA	NA	NA	NA	NA	NA	NA
NMR Metabolomics	C43-C44	C43-C44 Melanoma and other malignant neoplasms of skin	1499	t	8	-1.03732	0.7233	-2.0829	0.981	203	40.2	0.354	9.94	1
NMR Metabolomics	J20-J22	J20-J22 Other acute lower respiratory infections	1494	t	37	0.268902	0.4343	0.6873	0.246	201	41.5	0.331	9.94	1
MS Metabolomics	C81-C96	C81-C96 Malignant neoplasm of lymphoid, haematopoietic and related tissue	803	t	8	0.208667	0.7681	0.4244	0.336	234	21.8	0.25	6.89	1
Clinomics	C43-C44	C43-C44 Melanoma and other malignant neoplasms of skin	1657	t	11	-1.53414	0.6818	-3.0758	0.999	206	39.6	0.0309	8.98	1
MetaboAge	J80-J84	J80-J84 Other respiratory diseases principally affecting the interstitium	1771	t	12	0.046812	0.4414	0.11813	0.453	203	39.7	-14.6	20.78	1
DEXA	C15-C26	C15-C26 Malignant neoplasms of digestive organs	1064	t	17	-0.140588	0.5675	-0.302	0.619	206	34.8	0.439	10.15	1
MS Fatty Acid Lipidomics	ALL	ALL	751	t	296	-0.005149	0.1722	-0.0304	0.512	183	78.9	2.16	13.1	1
MS Fatty Acid Lipidomics	C43-C44	C43-C44 Melanoma and other malignant neoplasms of skin	881	t	6	-0.276475	0.7927	-0.5726	0.717	236	17.6	0.86	13.33	1
GlycanAge	I60-I69	I60-I69 Cerebrovascular diseases	1774	t	38	0.396624	0.3955	1.09172	0.137	201	40.8	0.256	10.1	1
DNAme Horvath CpGs	J09-J18	J09-J18 Influenza and pneumonia	887	t	22	1.50902	0.7231	3.0214	0.00126	232	24.2	0.352	4.39	0.5938
MS Metabolomics	J	J	768	t	98	0.049401	0.3325	0.1576	0.437	219	49.4	0.345	6.85	1
UPLC IgG Glycomics	C30-C39	C30-C39 Malignant neoplasm of respiratory and intrathoracic organs	1761	t	5	0.166159	0.8205	0.3544	0.362	203	39.4	0.175	9.62	1
DNAme Hannum CpGs	J	J	917	t	123	0.227798	0.4276	0.5894	0.278	218	50.2	0.259	3.97	1
MS Complex Lipidomics	J20-J22	J20-J22 Other acute lower respiratory infections	866	t	23	0.250681	0.5303	0.5575	0.289	232	25.6	0.782	9.36	1
MS Fatty Acid Lipidomics	I60-I69	I60-I69 Cerebrovascular diseases	882	t	20	0.901025	0.5143	2.04293	0.0205	235	20.3	0.896	13.31	1
MS Fatty Acid Lipidomics	E70-E90	E70-E90 Metabolic disorders	875	t	40	0.169434	0.4019	0.4604	0.323	231	32.3	0.902	13.36	1
DNAme Hannum CpGs	I60-I69	I60-I69 Cerebrovascular diseases	959	t	21	0.46202	0.735	0.92703	0.177	233	22	0.274	4.05	1
MS Metabolomics	I10-I15	I10-I15 Hypertensive diseases	767	t	132	0.602972	0.2998	2.1084	0.0175	212	56.3	0.395	6.85	1
Horvath 2013	E50-E64	E50-E64 Other nutritional deficiencies	976	t	7	0.19709	0.7901	0.406662	0.342	234	19	0.0508	5.93	1
GlycanAge	C43-C44	C43-C44 Melanoma and other malignant neoplasms of skin	1775	t	10	0.609067	0.6066	1.2627	0.103	202	39.8	0.238	10.11	1
DNAme Hannum CpGs	E00-E07	E00-E07 Disorders of thyroid gland	952	t	72	-0.109532	0.5176	-0.247127	0.598	224	44.5	0.253	4.05	1
UPLC IgG Glycomics	I20-I25	I20-I25 Ischaemic heart diseases	1724	t	107	0.265083	0.2813	0.98195	0.163	196	48.2	0.323	9.56	1
Clinomics	I30-I52	I30-I52 Other forms of heart disease	1632	t	122	0.060328	0.2278	0.2717	0.393	199	45.9	0.0479	9	1
DNAme Horvath CpGs	I60-I69	I60-I69 Cerebrovascular diseases	887	t	21	0.07474	0.7388	0.15012	0.44	232	23	0.351	4.38	1
Horvath 2013	E70-E90	E70-E90 Metabolic disorders	965	t	43	0.238954	0.4458	0.5987	0.275	229	32.9	0.0792	5.94	1
UPLC IgG Glycomics	I95-I99	I95-I99 Other and unspecified disorders of the circulatory system	1761	t	23	0.761007	0.5453	1.664	0.0481	202	39.4	0.17	9.63	1
NMR Metabolomics	C30-C39	C30-C39 Malignant neoplasm of respiratory and intrathoracic organs	1504	t	5	0.239621	0.8001	0.4993	0.309	203	39.8	0.342	9.93	1
MetaboAge	J95-J99	J95-J99 Other diseases of the respiratory system	1771	t	15	-0.120084	0.5079	-0.2742	0.608	202	40	-14.6	20.78	1
MS Metabolomics	E	E	782	t	115	-0.04449	0.3093	-0.15127	0.56	215	56.3	0.327	6.84	1
DNAme Hannum CpGs	I26-I28	I26-I28 Pulmonary heart disease and diseases of pulmonary circulation	959	t	10	0.136688	0.8468	0.3035	0.381	234	19.2	0.278	4.04	1
DEXA	C64-C68	C64-C68 Malignant neoplasm of urinary tract	1068	t	9	0.485907	0.7115	0.97229	0.165	207	33.8	0.436	10.14	1
DEXA	C60-C63	C60-C63 Malignant neoplasms of male genital organs	1065	t	9	-0.180761	0.7014	-0.362201	0.641	207	34.2	0.425	10.16	1
Clinomics	J	J	1586	t	185	0.388469	0.2023	1.9604	0.025	194	52.2	-0.118	8.97	1
MS Complex Lipidomics	C	C	852	t	60	0.808569	0.3669	2.3651	0.00901	226	40.9	0.875	9.31	1
MS Complex Lipidomics	C15-C26	C15-C26 Malignant neoplasms of digestive organs	869	t	16	0.242523	0.6073	0.5033	0.307	232	25.9	0.735	9.38	1
DNAme Horvath CpGs	I05-I09	I05-I09 Chronic rheumatic heart diseases	889	t	9	0.406227	0.855	0.9156	0.18	234	19.9	0.34	4.39	1
MetaboAge	I30-I52	I30-I52 Other forms of heart disease	1741	t	131	0.076837	0.1147	0.6742	0.25	196	46.6	-14.6	20.88	1
UPLC IgG Glycomics	I10-I15	I10-I15 Hypertensive diseases	1674	t	250	0.179504	0.1813	1.0064	0.157	186	56.5	0.407	9.59	1
Hannum 2013	C64-C68	C64-C68 Malignant neoplasm of urinary tract	976	t	10	0.127833	0.791	0.26404	0.396	233	21.3	0.0403	4.94	1
DEXA	C43-C44	C43-C44 Melanoma and other malignant neoplasms of skin	1066	t	8	-0.012312	0.7233	-0.0247	0.51	207	34.1	0.439	10.15	1
GlycanAge	J20-J22	J20-J22 Other acute lower respiratory infections	1767	t	45	0.364498	0.3662	1.0694	0.142	201	41.1	0.268	10.11	1
Hannum 2013	J40-J47	J40-J47 Chronic lower respiratory diseases	959	t	64	0.453894	0.4263	1.17711	0.12	226	39.4	0.0505	4.95	1
UPLC IgG Glycomics	C60-C63	C60-C63 Malignant neoplasms of male genital organs	1755	t	12	0.058865	0.6625	0.118669	0.453	202	40	0.193	9.64	1
MS Fatty Acid Lipidomics	I05-I09	I05-I09 Chronic rheumatic heart diseases	883	t	11	-0.347894	0.6931	-0.6962	0.757	236	16.5	0.872	13.32	1
DNAme Horvath CpGs	I20-I25	I20-I25 Ischaemic heart diseases	865	t	57	0.76287	0.546	1.66769	0.0477	225	40.9	0.356	4.41	1
GlycanAge	C76-C80	C76-C80 Malignant neoplasms of ill-defined, secondary and unspecified sites	1777	t	38	0.791232	0.3702	2.30593	0.0106	201	42.1	0.233	10.11	1
GlycanAge	I30-I52	I30-I52 Other forms of heart disease	1748	t	130	0.412723	0.2361	1.7985	0.036	196	46.1	0.313	10.05	1
DEXA	I26-I28	I26-I28 Pulmonary heart disease and diseases of pulmonary circulation	1068	t	11	0.578446	0.6667	1.1642	0.122	207	33.6	0.43	10.15	1
DNAme Horvath CpGs	E10-E14	E10-E14 Diabetes mellitus	882	t	37	0.919303	0.6303	1.8786	0.0301	229	34.2	0.347	4.4	1
DNAme Horvath CpGs	E	E	865	t	133	0.777686	0.392	2.15678	0.0155	214	56.3	0.348	4.41	1
Clinomics	I05-I09	I05-I09 Chronic rheumatic heart diseases	1661	t	14	0.177268	0.5441	0.3887	0.349	206	38.5	0.00666	9.01	1
Horvath 2013	C51-C58	C51-C58 Malignant neoplasms of female genital organs	974	t	7	-0.27239	0.8151	-0.5769	0.718	233	22.8	0.0504	5.94	1
GlycanAge	C30-C39	C30-C39 Malignant neoplasm of respiratory and intrathoracic organs	1779	t	5	-0.085212	0.7863	-0.1754	0.57	203	39.3	0.227	10.11	1
MetaboAge	C43-C44	C43-C44 Melanoma and other malignant neoplasms of skin	1766	t	12	0.21954	0.1646	1.3542	0.0878	202	40.3	-14.6	20.8	1
Hannum 2013	I30-I52	I30-I52 Other forms of heart disease	956	t	84	0.209148	0.4135	0.5552	0.289	225	38.4	0.0283	4.93	1
UPLC IgG Glycomics	I26-I28	I26-I28 Pulmonary heart disease and diseases of pulmonary circulation	1760	t	18	1.05363	0.564	2.2614	0.0119	202	39.5	0.161	9.63	1
UPLC IgG Glycomics	I30-I52	I30-I52 Other forms of heart disease	1731	t	128	0.557622	0.2564	2.2499	0.0122	196	46.1	0.278	9.58	1
MS Fatty Acid Lipidomics	I26-I28	I26-I28 Pulmonary heart disease and diseases of pulmonary circulation	883	t	9	-0.042245	0.7057	-0.0846	0.534	236	16.3	0.872	13.32	1
NMR Metabolomics	ALL	ALL	1264	t	411	0.004862	0.1405	0.035	0.486	164	69.3	1	9.78	1
DEXA	J90-J94	J90-J94 Other diseases of pleura	1067	t	9	0.785376	0.7072	1.5718	0.058	208	32.6	0.439	10.15	1
Mega Omics	E	E	725	t	109	0.320797	0.6073	0.66595	0.253	217	56.1	0.106	2.79	1
GlycanAge	C51-C58	C51-C58 Malignant neoplasms of female genital organs	1778	t	9	-0.247775	0.6908	-0.4961	0.69	202	40.1	0.232	10.11	1
DNAme Horvath CpGs	J90-J94	J90-J94 Other diseases of pleura	888	t	8	0.219211	0.8688	0.5094	0.305	234	18.8	0.338	4.4	1
MS Fatty Acid Lipidomics	J	J	842	t	116	-0.058214	0.2685	-0.2252	0.589	220	50	1.17	13.23	1
DEXA	ALL	ALL	890	t	315	-0.118022	0.1574	-0.7597	0.776	165	68.9	1.1	10.17	1
MS Complex Lipidomics	C60-C63	C60-C63 Malignant neoplasms of male genital organs	867	t	6	-0.364515	0.7844	-0.748614	0.773	234	19.6	0.768	9.37	1
MS Fatty Acid Lipidomics	J09-J18	J09-J18 Influenza and pneumonia	882	t	21	0.845417	0.5046	1.9405	0.0262	235	22.4	0.904	13.29	1
DEXA	I60-I69	I60-I69 Cerebrovascular diseases	1065	t	23	0.633001	0.5473	1.38177	0.0835	206	35.3	0.488	10.09	1
NMR Metabolomics	I	I	1348	t	305	0.143855	0.1633	0.893	0.186	177	62.4	1.02	9.77	1
Hannum 2013	C60-C63	C60-C63 Malignant neoplasms of male genital organs	970	t	7	0.163302	0.8182	0.348024	0.364	234	19.7	0.0471	4.95	1
GlycanAge	J90-J94	J90-J94 Other diseases of pleura	1774	t	18	0.934455	0.4853	2.2047	0.0137	202	39.5	0.231	10.12	1
DEXA	I30-I52	I30-I52 Other forms of heart disease	1050	t	84	0.591278	0.3074	2.0211	0.0216	201	42.5	0.553	10.1	1
Clinomics	C60-C63	C60-C63 Malignant neoplasms of male genital organs	1655	t	12	0.710766	0.5393	1.56428	0.0589	206	39.4	0.0265	9	1
MS Metabolomics	I60-I69	I60-I69 Cerebrovascular diseases	802	t	16	0.206646	0.6429	0.4196	0.337	233	22.2	0.263	6.88	1
DNAme Hannum CpGs	I95-I99	I95-I99 Other and unspecified disorders of the circulatory system	960	t	12	-0.041479	0.8321	-0.0899	0.536	234	18.9	0.272	4.05	1
Mega Omics	E50-E64	E50-E64 Other nutritional deficiencies	740	t	6	-0.036193	0.9565	-0.129806	0.552	236	16.1	0.119	2.78	1
DNAme Horvath CpGs	J	J	850	t	117	0.764306	0.4248	1.9878	0.0234	218	50.8	0.376	4.32	1
MS Complex Lipidomics	E00-E07	E00-E07 Disorders of thyroid gland	865	t	64	0.212422	0.3492	0.651057	0.258	225	43.7	0.737	9.39	1
DNAme Horvath CpGs	C30-C39	C30-C39 Malignant neoplasm of respiratory and intrathoracic organs	888	t	3	0.183289	0.9449	0.5927	0.277	234	18.9	0.341	4.4	1
Hannum 2013	C15-C26	C15-C26 Malignant neoplasms of digestive organs	972	t	17	-0.746001	0.6232	-1.5303	0.937	232	25.9	0.0202	4.93	1
MS Fatty Acid Lipidomics	J90-J94	J90-J94 Other diseases of pleura	881	t	10	0.705123	0.6547	1.4263	0.0769	236	15.8	0.907	13.3	1
UPLC IgG Glycomics	C15-C26	C15-C26 Malignant neoplasms of digestive organs	1757	t	21	0.960969	0.5465	2.1013	0.0178	202	40.3	0.165	9.63	1
NMR Metabolomics	C60-C63	C60-C63 Malignant neoplasms of male genital organs	1499	t	9	0.408629	0.6999	0.819058	0.206	202	40.3	0.362	9.93	1
Clinomics	E10-E14	E10-E14 Diabetes mellitus	1650	t	49	1.3931	0.3211	4.581	2.31e-06	203	42.7	0.0238	9.02	0.00111
Mega Omics	C	C	725	t	49	-0.675009	0.7554	-1.3631	0.914	229	37.4	0.133	2.78	1
Horvath 2013	I70-I79	I70-I79 Diseases of arteries, arterioles and capillaries	972	t	18	-0.204704	0.5179	-0.4621	0.678	232	24.8	0.0602	5.93	1
DEXA	J60-J70	J60-J70 Lung diseases due to external agents	1067	t	6	0.137675	0.7653	0.27947	0.39	208	32.8	0.443	10.14	1
UPLC IgG Glycomics	J90-J94	J90-J94 Other diseases of pleura	1756	t	18	1.20537	0.5808	2.546	0.00545	202	39.5	0.167	9.64	1
PEA Proteomics	I10-I15	I10-I15 Hypertensive diseases	707	t	130	-0.771253	0.421	-2.0196	0.978	212	60.2	0.00757	4.15	1
NMR Metabolomics	I26-I28	I26-I28 Pulmonary heart disease and diseases of pulmonary circulation	1503	t	13	0.497583	0.6232	1.0206	0.154	203	39.6	0.355	9.92	1
MetaboAge	E10-E14	E10-E14 Diabetes mellitus	1752	t	56	0.186008	0.0574	3.243	0.000591	200	43.9	-14.7	20.86	0.27973
Mega Omics	C15-C26	C15-C26 Malignant neoplasms of digestive organs	737	t	10	-0.10035	0.9283	-0.2905	0.614	236	20	0.113	2.78	1
MS Metabolomics	E10-E14	E10-E14 Diabetes mellitus	799	t	30	-0.55113	0.506	-1.2625	0.897	230	33.3	0.242	6.9	1
DNAme Hannum CpGs	E	E	936	t	142	0.602579	0.3882	1.683	0.0462	214	56.7	0.268	4.05	1
Horvath 2013	C81-C96	C81-C96 Malignant neoplasm of lymphoid, haematopoietic and related tissue	976	t	8	0.508564	0.7411	1.0225	0.153	233	20.9	0.0508	5.93	1
MS Fatty Acid Lipidomics	C60-C63	C60-C63 Malignant neoplasms of male genital organs	878	t	6	0.464453	0.7621	0.941721	0.173	236	17	0.917	13.33	1
Mega Omics	C76-C80	C76-C80 Malignant neoplasms of ill-defined, secondary and unspecified sites	738	t	17	-0.408998	0.8864	-0.99637	0.84	234	23.4	0.119	2.78	1
Horvath 2013	J09-J18	J09-J18 Influenza and pneumonia	974	t	24	0.0093	0.5166	0.021	0.492	232	24.4	0.0494	5.93	1
DNAme Horvath CpGs	C81-C96	C81-C96 Malignant neoplasm of lymphoid, haematopoietic and related tissue	889	t	6	0.708864	0.8892	1.7422	0.0407	234	20.9	0.34	4.39	1
DNAme Horvath CpGs	E00-E07	E00-E07 Disorders of thyroid gland	880	t	65	-0.173682	0.5194	-0.391119	0.652	224	43.1	0.33	4.4	1
MS Metabolomics	J90-J94	J90-J94 Other diseases of pleura	801	t	7	0.273442	0.7974	0.568	0.285	234	18.3	0.245	6.89	1
MS Metabolomics	E70-E90	E70-E90 Metabolic disorders	795	t	34	0.754727	0.523	1.693	0.0452	230	32.3	0.315	6.85	1
Mega Omics	C81-C96	C81-C96 Malignant neoplasm of lymphoid, haematopoietic and related tissue	740	t	6	0.376801	0.9591	1.388	0.0826	236	18.8	0.119	2.78	1
MS Metabolomics	I	I	722	t	187	0.198527	0.2645	0.7789	0.218	202	66.1	0.582	6.81	1
DNAme Hannum CpGs	J95-J99	J95-J99 Other diseases of the respiratory system	961	t	12	0.993564	0.8005	2.0721	0.0191	233	22.8	0.267	4.05	1
MS Fatty Acid Lipidomics	C81-C96	C81-C96 Malignant neoplasm of lymphoid, haematopoietic and related tissue	883	t	6	0.167658	0.7478	0.3375	0.368	236	17.9	0.872	13.32	1
MS Metabolomics	C15-C26	C15-C26 Malignant neoplasms of digestive organs	799	t	13	-0.639394	0.6511	-1.2927	0.902	233	24.2	0.254	6.9	1
Hannum 2013	E70-E90	E70-E90 Metabolic disorders	965	t	43	-0.116766	0.5311	-0.2593	0.602	229	32.9	0.0269	4.95	1
GlycanAge	E10-E14	E10-E14 Diabetes mellitus	1761	t	58	0.274634	0.3263	0.8902	0.187	200	43.9	0.253	10.11	1
DEXA	I05-I09	I05-I09 Chronic rheumatic heart diseases	1069	t	12	-0.251493	0.6475	-0.5098	0.695	208	32.9	0.428	10.14	1
UPLC IgG Glycomics	J80-J84	J80-J84 Other respiratory diseases principally affecting the interstitium	1762	t	11	1.08941	0.6969	2.17994	0.0146	202	39.6	0.166	9.63	1
MS Metabolomics	C64-C68	C64-C68 Malignant neoplasm of urinary tract	803	t	9	-0.056606	0.7417	-0.1136	0.545	234	21.2	0.25	6.89	1
GlycanAge	I95-I99	I95-I99 Other and unspecified disorders of the circulatory system	1779	t	23	0.546877	0.4631	1.3334	0.0912	202	39.4	0.228	10.11	1
Clinomics	J09-J18	J09-J18 Influenza and pneumonia	1660	t	36	-0.088186	0.4124	-0.2348	0.593	205	39.6	-0.00876	9.01	1
DNAme Horvath CpGs	J60-J70	J60-J70 Lung diseases due to external agents	886	t	9	0.200961	0.8581	0.45605	0.324	233	21.3	0.341	4.39	1
UPLC IgG Glycomics	C	C	1735	t	97	0.384043	0.281	1.4212	0.0776	196	47.4	0.265	9.62	1
Clinomics	E00-E07	E00-E07 Disorders of thyroid gland	1631	t	106	0.075446	0.2772	0.283347	0.388	199	49	0.029	9.04	1
Mega Omics	ALL	ALL	632	t	244	0.264172	0.4607	0.6462	0.259	183	79.3	0.0984	2.83	1
DEXA	I10-I15	I10-I15 Hypertensive diseases	1011	t	158	0.338065	0.2218	1.5632	0.059	190	54.3	0.726	10.15	1
DNAme Hannum CpGs	C30-C39	C30-C39 Malignant neoplasm of respiratory and intrathoracic organs	960	t	3	0.633445	0.9286	1.8387	0.033	234	18.7	0.269	4.05	1
PEA Proteomics	I	I	667	t	188	-0.047081	0.3597	-0.1405	0.556	200	69.1	0.025	4.15	1
MetaboAge	E70-E90	E70-E90 Metabolic disorders	1748	t	67	0.084379	0.1452	0.5875	0.278	199	44.1	-14.6	20.9	1
MetaboAge	J09-J18	J09-J18 Influenza and pneumonia	1769	t	42	0.147401	0.1324	1.124	0.131	202	40.5	-14.6	20.79	1
GlycanAge	J40-J47	J40-J47 Chronic lower respiratory diseases	1742	t	95	0.061795	0.2707	0.2372	0.406	197	47	0.239	10.09	1
DNAme Horvath CpGs	J40-J47	J40-J47 Chronic lower respiratory diseases	873	t	62	0.445694	0.5373	0.98358	0.163	225	40.7	0.357	4.34	1
DEXA	C	C	1051	t	71	-0.263229	0.3145	-0.8805	0.811	200	44.1	0.473	10.19	1
GlycanAge	J80-J84	J80-J84 Other respiratory diseases principally affecting the interstitium	1780	t	12	1.04804	0.5381	2.31154	0.0104	202	39.6	0.221	10.11	1
MS Fatty Acid Lipidomics	I10-I15	I10-I15 Hypertensive diseases	838	t	158	0.268956	0.2196	1.2554	0.105	212	59.8	1.48	13.17	1
GlycanAge	ALL	ALL	1488	t	487	0.232654	0.1237	1.8961	0.029	164	68.9	0.773	10	1
Mega Omics	I20-I25	I20-I25 Ischaemic heart diseases	722	t	53	0.811543	0.7575	1.64106	0.0504	227	42.7	0.111	2.79	1
GlycanAge	C64-C68	C64-C68 Malignant neoplasm of urinary tract	1779	t	10	0.691319	0.6113	1.42977	0.0764	202	39.6	0.224	10.11	1
Mega Omics	I95-I99	I95-I99 Other and unspecified disorders of the circulatory system	740	t	8	-0.089143	0.9433	-0.2848	0.612	236	16.2	0.119	2.78	1
GlycanAge	I70-I79	I70-I79 Diseases of arteries, arterioles and capillaries	1770	t	24	0.146177	0.4814	0.3463	0.365	202	40.7	0.244	10.11	1
GlycanAge	J09-J18	J09-J18 Influenza and pneumonia	1778	t	42	0.744837	0.3861	2.0913	0.0183	201	40.3	0.217	10.09	1
Clinomics	I26-I28	I26-I28 Pulmonary heart disease and diseases of pulmonary circulation	1661	t	18	0.100362	0.5429	0.2202	0.413	206	38.9	0.0112	9.01	1
GlycanAge	I26-I28	I26-I28 Pulmonary heart disease and diseases of pulmonary circulation	1778	t	18	0.906696	0.488	2.1297	0.0166	202	39.5	0.215	10.11	1
MS Fatty Acid Lipidomics	C64-C68	C64-C68 Malignant neoplasm of urinary tract	883	t	9	0.805805	0.6814	1.61754	0.0529	236	17.9	0.872	13.32	1
Clinomics	C15-C26	C15-C26 Malignant neoplasms of digestive organs	1657	t	22	-0.082135	0.4934	-0.1913	0.576	205	40	0.0144	9.02	1
DNAme Horvath CpGs	C	C	870	t	61	0.074089	0.5368	0.1637	0.435	225	41.7	0.369	4.39	1
MS Metabolomics	I20-I25	I20-I25 Ischaemic heart diseases	785	t	55	0.406792	0.448	1.01574	0.155	225	42.7	0.325	6.86	1
MS Complex Lipidomics	I26-I28	I26-I28 Pulmonary heart disease and diseases of pulmonary circulation	872	t	8	1.49617	0.7423	3.0076	0.00132	234	19.5	0.756	9.35	0.62012
Clinomics	E50-E64	E50-E64 Other nutritional deficiencies	1662	t	10	-0.029694	0.6684	-0.059756	0.524	206	38.5	0.00337	9.01	1
PEA Proteomics	C43-C44	C43-C44 Melanoma and other malignant neoplasms of skin	744	t	4	-0.027602	0.9254	-0.0787	0.531	237	16	0.0465	4.15	1
GlycanAge	E	E	1709	t	220	0.046742	0.1842	0.25863	0.398	188	55.7	0.338	10.06	1
MS Metabolomics	J80-J84	J80-J84 Other respiratory diseases principally affecting the interstitium	803	t	3	0.18713	0.8941	0.46714	0.32	234	19.3	0.25	6.89	1
Clinomics	C81-C96	C81-C96 Malignant neoplasm of lymphoid, haematopoietic and related tissue	1662	t	16	0.010316	0.5663	0.0221	0.491	206	39.5	0.00337	9.01	1
GlycanAge	E50-E64	E50-E64 Other nutritional deficiencies	1780	t	9	0.783156	0.6153	1.61244	0.0534	203	39.1	0.221	10.11	1
GlycanAge	I	I	1585	t	363	0.235176	0.1431	1.6597	0.0485	177	62	0.724	10.04	1
GlycanAge	C15-C26	C15-C26 Malignant neoplasms of digestive organs	1775	t	21	0.715435	0.4687	1.7275	0.042	202	40.3	0.216	10.12	1
DNAme Hannum CpGs	C15-C26	C15-C26 Malignant neoplasms of digestive organs	957	t	16	-0.410587	0.7938	-0.851	0.803	232	25.2	0.259	4.05	1
Clinomics	E70-E90	E70-E90 Metabolic disorders	1640	t	61	0.85301	0.3097	2.896	0.00189	202	43.3	0.0106	9.04	0.88252
GlycanAge	J60-J70	J60-J70 Lung diseases due to external agents	1777	t	12	0.575244	0.5799	1.21776	0.112	203	39.3	0.219	10.11	1
UPLC IgG Glycomics	E00-E07	E00-E07 Disorders of thyroid gland	1727	t	109	0.016788	0.2606	0.06672	0.473	196	49	0.17	9.62	1
DNAme Hannum CpGs	C64-C68	C64-C68 Malignant neoplasm of urinary tract	961	t	10	0.652926	0.8331	1.41657	0.0783	233	21.4	0.267	4.05	1
DEXA	E	E	1027	t	138	0.343068	0.2392	1.47738	0.0698	193	53.3	0.55	10.16	1
Clinomics	E	E	1602	t	206	0.665282	0.1862	3.63938	0.000137	191	55.5	0.0705	9.08	0.06504
MS Metabolomics	C	C	785	t	55	-0.400258	0.4005	-1.0925	0.863	226	39.2	0.316	6.88	1
Clinomics	I60-I69	I60-I69 Cerebrovascular diseases	1658	t	33	0.447707	0.4097	1.19803	0.115	205	39.8	0.00107	9.01	1
DEXA	I70-I79	I70-I79 Diseases of arteries, arterioles and capillaries	1062	t	12	0.356476	0.6434	0.7237	0.235	207	34.2	0.477	10.15	1
MS Complex Lipidomics	J95-J99	J95-J99 Other diseases of the respiratory system	873	t	13	0.206706	0.6457	0.4188	0.338	233	24.5	0.735	9.37	1
MS Fatty Acid Lipidomics	J60-J70	J60-J70 Lung diseases due to external agents	880	t	8	1.125	0.709	2.24995	0.0122	236	17.6	0.931	13.3	1
MS Fatty Acid Lipidomics	E10-E14	E10-E14 Diabetes mellitus	877	t	35	-0.661312	0.4641	-1.6089	0.946	232	30.7	0.985	13.27	1
Mega Omics	E10-E14	E10-E14 Diabetes mellitus	736	t	26	0.138967	0.842	0.3059	0.38	233	28.5	0.117	2.79	1
Horvath 2013	C60-C63	C60-C63 Malignant neoplasms of male genital organs	970	t	7	-0.301928	0.5753	-0.641224	0.739	234	19.7	0.0468	5.95	1
NMR Metabolomics	I60-I69	I60-I69 Cerebrovascular diseases	1502	t	27	-0.022276	0.4878	-0.05232	0.521	202	40.6	0.358	9.93	1
MS Fatty Acid Lipidomics	C	C	864	t	60	0.575425	0.347	1.764	0.0389	228	40.3	1.06	13.29	1
MS Metabolomics	J95-J99	J95-J99 Other diseases of the respiratory system	803	t	10	0.279101	0.7368	0.5603	0.288	233	23.3	0.25	6.89	1
Clinomics	I20-I25	I20-I25 Ischaemic heart diseases	1625	t	97	0.620003	0.2548	2.51716	0.00592	199	47.8	0.119	8.98	1
Clinomics	C51-C58	C51-C58 Malignant neoplasms of female genital organs	1661	t	8	0.38545	0.7184	0.7712	0.22	206	39.3	0.00271	9.01	1
Mega Omics	C60-C63	C60-C63 Malignant neoplasms of male genital organs	735	t	5	-0.235923	0.9613	-0.893712	0.814	237	15.8	0.117	2.78	1
UPLC IgG Glycomics	J20-J22	J20-J22 Other acute lower respiratory infections	1749	t	43	0.419916	0.4196	1.1023	0.135	201	41.3	0.216	9.62	1
Clinomics	I10-I15	I10-I15 Hypertensive diseases	1577	t	241	0.661147	0.1666	4.0251	2.85e-05	188	57.1	0.144	9	0.01361
PEA Proteomics	I95-I99	I95-I99 Other and unspecified disorders of the circulatory system	746	t	11	0.016473	0.8345	0.0358	0.486	236	16.3	0.0325	4.16	1
Mega Omics	I26-I28	I26-I28 Pulmonary heart disease and diseases of pulmonary circulation	740	t	8	0.27166	0.9401	0.8478	0.198	236	16.8	0.119	2.78	1
DNAme Hannum CpGs	I10-I15	I10-I15 Hypertensive diseases	912	t	165	0.905802	0.369	2.6406	0.00414	210	59.6	0.328	4.04	1
Clinomics	C30-C39	C30-C39 Malignant neoplasm of respiratory and intrathoracic organs	1661	t	5	-0.231989	0.7749	-0.4737	0.682	206	38.7	0.000232	9.01	1
PEA Proteomics	I70-I79	I70-I79 Diseases of arteries, arterioles and capillaries	743	t	15	0.51347	0.7897	1.0598	0.145	235	23.4	0.0299	4.16	1
Clinomics	C64-C68	C64-C68 Malignant neoplasm of urinary tract	1661	t	10	-0.147408	0.665	-0.2963	0.616	206	38.8	0.00668	9.01	1
DNAme Hannum CpGs	J80-J84	J80-J84 Other respiratory diseases principally affecting the interstitium	961	t	5	-0.014238	0.9126	-0.03813	0.515	234	19.3	0.267	4.05	1
Horvath 2013	J60-J70	J60-J70 Lung diseases due to external agents	973	t	9	-0.182202	0.6678	-0.36653	0.643	234	20.9	0.0602	5.94	1
Clinomics	J40-J47	J40-J47 Chronic lower respiratory diseases	1627	t	94	1.07021	0.2628	4.2203	1.22e-05	200	47.2	-0.0426	8.99	0.00584
UPLC IgG Glycomics	E70-E90	E70-E90 Metabolic disorders	1740	t	67	0.641181	0.3453	1.9783	0.0239	199	44.3	0.224	9.59	1
Hannum 2013	J95-J99	J95-J99 Other diseases of the respiratory system	976	t	13	0.158615	0.7423	0.3189	0.375	233	23.5	0.0403	4.94	1
PEA Proteomics	C76-C80	C76-C80 Malignant neoplasms of ill-defined, secondary and unspecified sites	744	t	18	0.593849	0.7759	1.2136	0.112	234	26.6	0.0305	4.16	1
GlycanAge	I20-I25	I20-I25 Ischaemic heart diseases	1742	t	107	0.139934	0.2494	0.57925	0.281	196	48.2	0.367	10.06	1
DNAme Hannum CpGs	J09-J18	J09-J18 Influenza and pneumonia	959	t	24	1.291	0.7017	2.5824	0.00491	232	24.6	0.265	4.04	1
Clinomics	I	I	1477	t	341	0.250165	0.145	1.7425	0.0407	180	62.8	0.308	9.01	1
DEXA	J20-J22	J20-J22 Other acute lower respiratory infections	1062	t	30	0.567582	0.4812	1.3457	0.0892	206	35.2	0.465	10.12	1
DNAme Horvath CpGs	E70-E90	E70-E90 Metabolic disorders	879	t	40	0.873651	0.6139	1.8029	0.0357	229	33.3	0.357	4.39	1
DNAme Hannum CpGs	C	C	938	t	69	0.416811	0.5219	0.9359	0.175	225	42.3	0.302	4.01	1
PEA Proteomics	J09-J18	J09-J18 Influenza and pneumonia	745	t	19	0.309642	0.7479	0.6237	0.266	235	22.8	0.0337	4.16	1
NMR Metabolomics	E	E	1446	t	174	0.485585	0.2199	2.26503	0.0118	189	55.5	0.491	9.97	1
Horvath 2013	J90-J94	J90-J94 Other diseases of pleura	974	t	10	0.428176	0.7225	0.8573	0.196	234	18.7	0.0522	5.94	1
DEXA	J80-J84	J80-J84 Other respiratory diseases principally affecting the interstitium	1069	t	7	0.852756	0.7906	1.76234	0.039	208	32.9	0.428	10.14	1
NMR Metabolomics	J80-J84	J80-J84 Other respiratory diseases principally affecting the interstitium	1504	t	8	1.71483	0.7349	3.44366	0.000287	203	39.8	0.342	9.93	0.13601
PEA Proteomics	C51-C58	C51-C58 Malignant neoplasms of female genital organs	745	t	6	-0.4358	0.9062	-1.1371	0.872	236	20.5	0.037	4.16	1
Clinomics	I95-I99	I95-I99 Other and unspecified disorders of the circulatory system	1660	t	23	0.382444	0.4574	0.9398	0.174	206	38.8	0.0132	9.01	1
DNAme Hannum CpGs	C76-C80	C76-C80 Malignant neoplasms of ill-defined, secondary and unspecified sites	959	t	25	0.743996	0.6977	1.48898	0.0682	231	28.3	0.266	4.04	1
GlycanAge	C81-C96	C81-C96 Malignant neoplasm of lymphoid, haematopoietic and related tissue	1780	t	16	1.55827	0.4893	3.6537	0.000129	202	40	0.221	10.11	0.06165
MS Complex Lipidomics	I05-I09	I05-I09 Chronic rheumatic heart diseases	873	t	12	0.596065	0.6733	1.197	0.116	234	20.3	0.735	9.37	1
MS Complex Lipidomics	I30-I52	I30-I52 Other forms of heart disease	855	t	74	0.570971	0.3309	1.8283	0.0338	225	38.6	0.816	9.35	1
Horvath 2013	I95-I99	I95-I99 Other and unspecified disorders of the circulatory system	975	t	13	-1.23908	0.3436	-3.8329	1	234	19.2	0.0561	5.94	1
MS Metabolomics	I05-I09	I05-I09 Chronic rheumatic heart diseases	803	t	9	0.86807	0.7686	1.7647	0.0388	234	19.4	0.25	6.89	1
MS Complex Lipidomics	C51-C58	C51-C58 Malignant neoplasms of female genital organs	871	t	6	-0.065492	0.7621	-0.1328	0.553	234	22.6	0.775	9.34	1
MS Complex Lipidomics	I70-I79	I70-I79 Diseases of arteries, arterioles and capillaries	869	t	18	-0.091184	0.5801	-0.1931	0.577	232	25.8	0.756	9.36	1
DEXA	J	J	1029	t	116	0.235665	0.257	0.9491	0.171	196	47.8	0.521	10.1	1
Mega Omics	J40-J47	J40-J47 Chronic lower respiratory diseases	727	t	50	0.31645	0.7508	0.63806	0.262	228	39.4	0.123	2.77	1
PEA Proteomics	J60-J70	J60-J70 Lung diseases due to external agents	743	t	6	0.190101	0.903	0.49006	0.312	236	18.7	0.0369	4.15	1
MS Metabolomics	I30-I52	I30-I52 Other forms of heart disease	789	t	61	0.709939	0.4239	1.8493	0.0322	227	36.2	0.289	6.88	1
Mega Omics	C51-C58	C51-C58 Malignant neoplasms of female genital organs	739	t	6	-0.532533	0.9483	-1.77	0.962	236	20.7	0.124	2.78	1
Mega Omics	I70-I79	I70-I79 Diseases of arteries, arterioles and capillaries	737	t	16	0.189527	0.8924	0.4708	0.319	234	24.6	0.119	2.78	1
MS Fatty Acid Lipidomics	I20-I25	I20-I25 Ischaemic heart diseases	858	t	63	-0.18993	0.3512	-0.57752	0.718	227	41.9	1.19	13.23	1
Mega Omics	J60-J70	J60-J70 Lung diseases due to external agents	738	t	7	0.036673	0.9474	0.1209	0.452	236	17.5	0.119	2.78	1
Mega Omics	J95-J99	J95-J99 Other diseases of the respiratory system	740	t	8	0.29721	0.9431	0.9479	0.172	236	18.6	0.119	2.78	1
Mega Omics	C64-C68	C64-C68 Malignant neoplasm of urinary tract	740	t	8	0.18435	0.9445	0.59379	0.276	236	17.9	0.119	2.78	1
DNAme Horvath CpGs	C51-C58	C51-C58 Malignant neoplasms of female genital organs	888	t	6	-0.306289	0.886	-0.7457	0.772	233	22.9	0.343	4.39	1
MetaboAge	I26-I28	I26-I28 Pulmonary heart disease and diseases of pulmonary circulation	1769	t	17	-0.638649	0.4812	-1.5158	0.935	203	39.4	-14.6	20.79	1
MS Metabolomics	J20-J22	J20-J22 Other acute lower respiratory infections	797	t	19	0.56495	0.6254	1.1575	0.124	232	26.4	0.278	6.88	1
UPLC IgG Glycomics	J09-J18	J09-J18 Influenza and pneumonia	1761	t	40	0.748086	0.4403	1.8924	0.0292	201	40.5	0.175	9.62	1
DEXA	E50-E64	E50-E64 Other nutritional deficiencies	1069	t	8	0.436969	0.7278	0.875095	0.191	208	33	0.428	10.14	1
DNAme Hannum CpGs	J90-J94	J90-J94 Other diseases of pleura	959	t	10	0.50494	0.8342	1.0969	0.136	234	18.8	0.28	4.04	1
MS Complex Lipidomics	C76-C80	C76-C80 Malignant neoplasms of ill-defined, secondary and unspecified sites	871	t	20	0.552047	0.5606	1.19082	0.117	232	26.6	0.767	9.35	1
MS Complex Lipidomics	C43-C44	C43-C44 Melanoma and other malignant neoplasms of skin	870	t	5	-0.458918	0.7996	-0.9564	0.831	234	20.4	0.719	9.37	1
Mega Omics	J09-J18	J09-J18 Influenza and pneumonia	739	t	19	1.19434	0.8834	2.8849	0.00196	234	23	0.125	2.78	0.91228
GlycanAge	E70-E90	E70-E90 Metabolic disorders	1758	t	67	0.501231	0.3048	1.7267	0.0421	199	44.1	0.28	10.07	1
MetaboAge	I	I	1578	t	357	0.073794	0.0526	1.4062	0.0798	177	62.2	-14	21.56	1
MS Complex Lipidomics	J	J	831	t	110	-0.082811	0.277	-0.3111	0.622	218	51	0.863	9.28	1
MetaboAge	I60-I69	I60-I69 Cerebrovascular diseases	1765	t	38	0.116515	0.1734	0.68234	0.248	202	40.7	-14.6	20.8	1
MetaboAge	E00-E07	E00-E07 Disorders of thyroid gland	1735	t	107	0.016878	0.1276	0.133248	0.447	196	49	-14.5	20.9	1
DNAme Hannum CpGs	I30-I52	I30-I52 Other forms of heart disease	942	t	80	0.771802	0.4754	1.8454	0.0325	225	37.8	0.308	4.03	1
Clinomics	ALL	ALL	1388	t	463	0.236576	0.1296	1.841	0.0328	166	70.1	0.292	8.96	1
GlycanAge	E00-E07	E00-E07 Disorders of thyroid gland	1745	t	110	-0.205099	0.2566	-0.828622	0.796	196	49	0.249	10.09	1
MetaboAge	I70-I79	I70-I79 Diseases of arteries, arterioles and capillaries	1761	t	24	0.120823	0.1499	0.8148	0.208	202	40.7	-14.6	20.83	1
MetaboAge	C51-C58	C51-C58 Malignant neoplasms of female genital organs	1769	t	9	-0.386521	0.5938	-0.8098	0.791	202	40.3	-14.6	20.77	1
MS Fatty Acid Lipidomics	C30-C39	C30-C39 Malignant neoplasm of respiratory and intrathoracic organs	882	t	2	0.231297	0.8829	0.5579	0.288	237	13.7	0.891	13.32	1
DEXA	I95-I99	I95-I99 Other and unspecified disorders of the circulatory system	1068	t	14	0.117037	0.6134	0.2419	0.404	208	32.9	0.438	10.14	1
MetaboAge	C	C	1745	t	106	-0.166404	0.2144	-0.7979	0.788	196	48.2	-14.5	20.85	1
NMR Metabolomics	I05-I09	I05-I09 Chronic rheumatic heart diseases	1503	t	12	0.111056	0.6403	0.2256	0.411	203	39.6	0.342	9.94	1
Mega Omics	I60-I69	I60-I69 Cerebrovascular diseases	739	t	15	-0.15988	0.9011	-0.40915	0.659	235	18.6	0.118	2.78	1
DNAme Hannum CpGs	C43-C44	C43-C44 Melanoma and other malignant neoplasms of skin	958	t	8	-0.730275	0.8908	-1.8088	0.965	234	21.6	0.276	4.05	1
MetaboAge	C81-C96	C81-C96 Malignant neoplasm of lymphoid, haematopoietic and related tissue	1771	t	17	-0.204087	0.4784	-0.4857	0.686	202	40.1	-14.6	20.78	1
PEA Proteomics	E	E	730	t	104	0.356645	0.4419	0.90161	0.184	218	53.7	0.0504	4.17	1
MS Complex Lipidomics	J80-J84	J80-J84 Other respiratory diseases principally affecting the interstitium	873	t	3	-0.14959	0.8611	-0.34175	0.634	234	19.7	0.735	9.37	1
MS Complex Lipidomics	I10-I15	I10-I15 Hypertensive diseases	831	t	156	-0.026693	0.2353	-0.1169	0.547	209	60.4	1.05	9.29	1
DNAme Hannum CpGs	ALL	ALL	812	t	314	0.473501	0.2894	1.7099	0.0436	182	78.3	0.348	3.97	1
MetaboAge	I05-I09	I05-I09 Chronic rheumatic heart diseases	1770	t	14	-0.00789	0.5079	-0.018	0.507	203	39.2	-14.6	20.78	1
DNAme Hannum CpGs	E70-E90	E70-E90 Metabolic disorders	950	t	42	0.755344	0.6013	1.5719	0.058	229	33.1	0.276	4.04	1
NMR Metabolomics	J95-J99	J95-J99 Other diseases of the respiratory system	1504	t	14	0.721217	0.6123	1.4885	0.0683	202	40.3	0.342	9.93	1
MS Complex Lipidomics	J90-J94	J90-J94 Other diseases of pleura	872	t	9	0.411578	0.705	0.8226	0.205	234	18.8	0.75	9.36	1
MetaboAge	C76-C80	C76-C80 Malignant neoplasms of ill-defined, secondary and unspecified sites	1768	t	37	-0.305368	0.3487	-0.93578	0.825	201	41.9	-14.6	20.79	1
MetaboAge	I95-I99	I95-I99 Other and unspecified disorders of the circulatory system	1769	t	24	-0.148852	0.416	-0.3932	0.653	202	39.5	-14.6	20.79	1
MetaboAge	I20-I25	I20-I25 Ischaemic heart diseases	1733	t	102	0.07921	0.1407	0.56867	0.285	196	48	-14.5	20.94	1
MetaboAge	J	J	1694	t	194	0.065373	0.0732	0.8944	0.186	191	52.4	-14.8	19.46	1
MS Fatty Acid Lipidomics	J95-J99	J95-J99 Other diseases of the respiratory system	883	t	12	0.812237	0.629	1.6597	0.0485	235	20.6	0.872	13.32	1
MetaboAge	C15-C26	C15-C26 Malignant neoplasms of digestive organs	1767	t	22	-0.28663	0.4355	-0.7316	0.768	202	40.5	-14.6	20.8	1
MS Fatty Acid Lipidomics	I	I	791	t	220	0.116201	0.19	0.6229	0.267	201	68.1	1.95	13.13	1
DNAme Horvath CpGs	J95-J99	J95-J99 Other diseases of the respiratory system	889	t	11	0.94731	0.8162	2.0088	0.0223	233	23.2	0.34	4.39	1
UPLC IgG Glycomics	E50-E64	E50-E64 Other nutritional deficiencies	1762	t	8	0.287651	0.7191	0.575502	0.282	203	39.1	0.166	9.63	1
MetaboAge	J60-J70	J60-J70 Lung diseases due to external agents	1768	t	12	0.119688	0.1854	0.65738	0.255	203	39.3	-14.6	20.79	1
Mega Omics	I	I	665	t	179	0.791301	0.5214	1.7784	0.0377	201	68.9	0.11	2.82	1
MS Fatty Acid Lipidomics	E50-E64	E50-E64 Other nutritional deficiencies	883	t	7	-0.789432	0.7738	-1.61033	0.946	236	16.2	0.872	13.32	1
GlycanAge	I10-I15	I10-I15 Hypertensive diseases	1691	t	252	0.156322	0.1742	0.912	0.181	186	56.5	0.481	10.04	1
Clinomics	J80-J84	J80-J84 Other respiratory diseases principally affecting the interstitium	1662	t	9	1.02408	0.6213	2.10537	0.0176	206	38.7	0.00337	9.01	1
GlycanAge	J	J	1701	t	197	0.066291	0.1952	0.3461	0.365	191	52	0.218	10.04	1
MetaboAge	ALL	ALL	1482	t	480	0.022401	0.0679	0.3308	0.37	164	69.3	-14.1	20.22	1
DNAme Horvath CpGs	C76-C80	C76-C80 Malignant neoplasms of ill-defined, secondary and unspecified sites	888	t	24	0.206812	0.7115	0.41388	0.339	231	28.9	0.336	4.39	1
MetaboAge	J20-J22	J20-J22 Other acute lower respiratory infections	1760	t	44	0.128841	0.1272	1.0209	0.154	201	41.1	-14.6	20.82	1
DEXA	E70-E90	E70-E90 Metabolic disorders	1051	t	37	0.93797	0.4468	2.3461	0.00949	204	39.6	0.509	10.16	1
GlycanAge	J95-J99	J95-J99 Other diseases of the respiratory system	1780	t	14	0.108044	0.5786	0.2288	0.41	202	39.7	0.221	10.11	1
MS Fatty Acid Lipidomics	C76-C80	C76-C80 Malignant neoplasms of ill-defined, secondary and unspecified sites	881	t	20	-0.03764	0.5465	-0.0824	0.533	234	23.4	0.916	13.3	1
GlycanAge	I05-I09	I05-I09 Chronic rheumatic heart diseases	1779	t	15	0.040986	0.5697	0.0876	0.465	202	39.1	0.221	10.11	1
MetaboAge	C64-C68	C64-C68 Malignant neoplasm of urinary tract	1770	t	11	0.088907	0.2917	0.31809	0.375	203	39.7	-14.6	20.79	1
PEA Proteomics	I26-I28	I26-I28 Pulmonary heart disease and diseases of pulmonary circulation	745	t	6	-0.165041	0.8973	-0.4169	0.662	236	15.7	0.0425	4.15	1
PEA Proteomics	E70-E90	E70-E90 Metabolic disorders	740	t	34	0.129935	0.6497	0.2631	0.396	231	32.1	0.0352	4.16	1
Mega Omics	J90-J94	J90-J94 Other diseases of pleura	739	t	7	0.234524	0.9499	0.7902	0.215	236	14.8	0.122	2.78	1
NMR Metabolomics	I30-I52	I30-I52 Other forms of heart disease	1478	t	109	0.02135	0.2658	0.0832	0.467	196	46.6	0.471	9.87	1
MS Metabolomics	E50-E64	E50-E64 Other nutritional deficiencies	803	t	4	-0.942468	0.8119	-1.98925	0.977	234	18.8	0.25	6.89	1
MS Metabolomics	C43-C44	C43-C44 Melanoma and other malignant neoplasms of skin	801	t	5	-0.551222	0.804	-1.1537	0.876	234	20.5	0.24	6.88	1
UPLC IgG Glycomics	I05-I09	I05-I09 Chronic rheumatic heart diseases	1761	t	15	0.56112	0.6309	1.1475	0.126	202	39.2	0.166	9.63	1
MS Fatty Acid Lipidomics	C51-C58	C51-C58 Malignant neoplasms of female genital organs	881	t	7	-0.122605	0.7225	-0.2452	0.597	236	21	0.918	13.3	1
DNAme Hannum CpGs	C81-C96	C81-C96 Malignant neoplasm of lymphoid, haematopoietic and related tissue	961	t	8	0.998792	0.8468	2.2176	0.0133	233	21	0.267	4.05	1
MS Metabolomics	C51-C58	C51-C58 Malignant neoplasms of female genital organs	801	t	6	0.068227	0.8094	0.1436	0.443	234	22.7	0.265	6.89	1
MS Fatty Acid Lipidomics	I70-I79	I70-I79 Diseases of arteries, arterioles and capillaries	879	t	17	0.099066	0.5805	0.2097	0.417	235	23.2	0.882	13.32	1
DNAme Hannum CpGs	J20-J22	J20-J22 Other acute lower respiratory infections	954	t	24	1.01315	0.7044	2.0265	0.0214	232	25.2	0.287	4.02	1
Horvath 2013	I30-I52	I30-I52 Other forms of heart disease	956	t	84	-0.25792	0.292	-0.9235	0.822	225	38.4	0.0714	5.95	1
Horvath 2013	I20-I25	I20-I25 Ischaemic heart diseases	948	t	67	0.514078	0.3749	1.47939	0.0695	225	42.3	0.0584	5.96	1
PEA Proteomics	E10-E14	E10-E14 Diabetes mellitus	741	t	26	0.054392	0.6884	0.1089	0.457	233	27.2	0.0341	4.16	1
MS Metabolomics	I95-I99	I95-I99 Other and unspecified disorders of the circulatory system	803	t	8	0.332804	0.7799	0.6821	0.248	234	18.1	0.25	6.89	1
DEXA	J95-J99	J95-J99 Other diseases of the respiratory system	1069	t	8	0.246852	0.7156	0.4937	0.311	208	33.3	0.428	10.14	1
DNAme Horvath CpGs	I30-I52	I30-I52 Other forms of heart disease	873	t	70	0.242409	0.5075	0.5543	0.29	225	38	0.384	4.39	1
Horvath 2013	E	E	950	t	144	0.408046	0.2739	1.54798	0.0608	214	56.7	0.0658	5.96	1
Horvath 2013	J	J	932	t	127	0.599483	0.3018	2.0835	0.0186	218	50.6	0.0771	5.94	1
Horvath 2013	I60-I69	I60-I69 Cerebrovascular diseases	974	t	22	-0.14822	0.5174	-0.33475	0.631	233	22.5	0.0472	5.93	1
MS Metabolomics	C76-C80	C76-C80 Malignant neoplasms of ill-defined, secondary and unspecified sites	801	t	19	-0.385261	0.598	-0.80343	0.789	232	25.8	0.266	6.89	1
DEXA	C51-C58	C51-C58 Malignant neoplasms of female genital organs	1069	t	4	-0.768709	0.7877	-1.5844	0.943	208	32.8	0.428	10.14	1
DEXA	C30-C39	C30-C39 Malignant neoplasm of respiratory and intrathoracic organs	1069	t	4	0.048045	0.8392	0.1053	0.458	208	32.9	0.428	10.14	1
Mega Omics	E70-E90	E70-E90 Metabolic disorders	734	t	38	0.86806	0.7973	1.8038	0.0356	231	33.9	0.117	2.78	1
Mega Omics	C30-C39	C30-C39 Malignant neoplasm of respiratory and intrathoracic organs	739	t	2	0.117908	0.9859	0.7144	0.237	237	13.9	0.118	2.78	1
NMR Metabolomics	C81-C96	C81-C96 Malignant neoplasm of lymphoid, haematopoietic and related tissue	1504	t	15	0.551071	0.6011	1.1478	0.126	202	40.5	0.342	9.93	1
PEA Proteomics	C60-C63	C60-C63 Malignant neoplasms of male genital organs	741	t	3	-0.092492	0.9456	-0.30076	0.618	237	12.5	0.0289	4.16	1
DNAme Hannum CpGs	C51-C58	C51-C58 Malignant neoplasms of female genital organs	959	t	7	-0.493519	0.8848	-1.1967	0.884	233	22.9	0.275	4.05	1
DNAme Horvath CpGs	C60-C63	C60-C63 Malignant neoplasms of male genital organs	883	t	7	0.483175	0.8715	1.13127	0.129	234	20.1	0.349	4.4	1
Horvath 2013	I26-I28	I26-I28 Pulmonary heart disease and diseases of pulmonary circulation	974	t	10	0.352525	0.7317	0.7072	0.24	234	19.1	0.0694	5.92	1
Mega Omics	C43-C44	C43-C44 Melanoma and other malignant neoplasms of skin	738	t	4	-0.410765	0.967	-1.6662	0.952	236	16.5	0.131	2.77	1
Horvath 2013	ALL	ALL	825	t	320	0.401026	0.2023	2.0239	0.0215	181	78.5	0.186	5.51	1
DNAme Hannum CpGs	E10-E14	E10-E14 Diabetes mellitus	954	t	39	0.596582	0.6239	1.2234	0.111	229	33.5	0.271	4.05	1
NMR Metabolomics	E70-E90	E70-E90 Metabolic disorders	1485	t	50	0.36531	0.3815	1.0361	0.15	200	43.7	0.426	9.93	1
MS Complex Lipidomics	C81-C96	C81-C96 Malignant neoplasm of lymphoid, haematopoietic and related tissue	873	t	7	0.88399	0.7448	1.7795	0.0376	234	21.4	0.735	9.37	1
Horvath 2013	E10-E14	E10-E14 Diabetes mellitus	968	t	39	-0.02235	0.4208	-0.0585	0.523	229	33.3	0.0609	5.94	1
Horvath 2013	I05-I09	I05-I09 Chronic rheumatic heart diseases	976	t	12	0.982218	0.6073	2.0363	0.0209	234	19.7	0.0508	5.93	1
Horvath 2013	E00-E07	E00-E07 Disorders of thyroid gland	967	t	74	0.410567	0.3845	1.1545	0.124	224	44.7	0.0343	5.94	1
UPLC IgG Glycomics	ALL	ALL	1474	t	484	0.277174	0.1262	2.2132	0.0134	164	68.9	0.702	9.53	1
Horvath 2013	C	C	953	t	70	-0.303015	0.2755	-1.1476	0.874	225	42.5	0.0532	5.97	1
UPLC IgG Glycomics	C64-C68	C64-C68 Malignant neoplasm of urinary tract	1761	t	10	0.894997	0.7028	1.7901	0.0367	202	39.6	0.171	9.63	1
PEA Proteomics	J20-J22	J20-J22 Other acute lower respiratory infections	742	t	18	0.621666	0.7581	1.2574	0.104	235	23.8	0.0392	4.14	1
MS Complex Lipidomics	ALL	ALL	741	t	291	0.126363	0.1771	0.7251	0.234	181	79.1	1.41	9.16	1
Horvath 2013	C76-C80	C76-C80 Malignant neoplasms of ill-defined, secondary and unspecified sites	974	t	25	0.014631	0.5295	0.03261	0.487	231	28.1	0.0501	5.94	1
Horvath 2013	C43-C44	C43-C44 Melanoma and other malignant neoplasms of skin	973	t	8	-0.614239	0.4204	-1.6094	0.946	234	21.5	0.0572	5.94	1
MS Metabolomics	C30-C39	C30-C39 Malignant neoplasm of respiratory and intrathoracic organs	803	t	2	-0.017376	0.9192	-0.048	0.519	235	17.5	0.25	6.89	1
Mega Omics	I30-I52	I30-I52 Other forms of heart disease	724	t	64	0.634977	0.7112	1.2699	0.102	227	38.6	0.139	2.77	1
Horvath 2013	J80-J84	J80-J84 Other respiratory diseases principally affecting the interstitium	976	t	5	-0.028964	0.8057	-0.06065	0.524	234	19.3	0.0508	5.93	1
Mega Omics	J80-J84	J80-J84 Other respiratory diseases principally affecting the interstitium	740	t	2	0.097043	0.9862	0.59336	0.276	237	16.1	0.119	2.78	1
MS Fatty Acid Lipidomics	E00-E07	E00-E07 Disorders of thyroid gland	875	t	65	-0.000256	0.3364	-0.000808	0.5	226	42.9	0.896	13.37	1
Horvath 2013	J95-J99	J95-J99 Other diseases of the respiratory system	976	t	13	0.1938	0.6684	0.3898	0.348	233	23.5	0.0508	5.93	1
UPLC IgG Glycomics	J95-J99	J95-J99 Other diseases of the respiratory system	1762	t	14	0.406317	0.6271	0.8327	0.203	202	39.8	0.166	9.63	1
NMR Metabolomics	J	J	1440	t	171	0.318135	0.2152	1.5133	0.0651	190	53.1	0.288	9.86	1
PEA Proteomics	I05-I09	I05-I09 Chronic rheumatic heart diseases	746	t	10	-0.162538	0.8398	-0.3565	0.639	236	17.2	0.0325	4.16	1
DEXA	I20-I25	I20-I25 Ischaemic heart diseases	1050	t	67	0.694498	0.3416	2.16341	0.0153	201	44.3	0.571	10.14	1
Horvath 2013	C30-C39	C30-C39 Malignant neoplasm of respiratory and intrathoracic organs	975	t	3	-0.496355	0.6052	-1.0307	0.849	234	18.6	0.051	5.94	1
DNAme Horvath CpGs	I	I	796	t	208	0.194517	0.329	0.6261	0.266	200	67.3	0.428	4.42	1
DNAme Horvath CpGs	J20-J22	J20-J22 Other acute lower respiratory infections	882	t	21	1.7806	0.7315	3.57	0.000178	232	25.2	0.365	4.38	0.08478
DNAme Hannum CpGs	I	I	856	t	229	0.835785	0.3272	2.7035	0.00343	200	67.5	0.342	4.04	1
NMR Metabolomics	C64-C68	C64-C68 Malignant neoplasm of urinary tract	1503	t	7	0.026169	0.7361	0.05244	0.479	203	39.8	0.344	9.94	1
PEA Proteomics	J	J	712	t	94	0.486085	0.4784	1.1568	0.124	220	51.4	0.085	4.15	1
MS Complex Lipidomics	I95-I99	I95-I99 Other and unspecified disorders of the circulatory system	872	t	11	1.23525	0.6806	2.4758	0.00665	234	19.7	0.745	9.37	1
Horvath 2013	C64-C68	C64-C68 Malignant neoplasm of urinary tract	976	t	10	0.606608	0.7107	1.213	0.113	233	21.3	0.0508	5.93	1
MetaboAge	E50-E64	E50-E64 Other nutritional deficiencies	1771	t	10	0.154416	0.18	0.87176	0.192	203	39.2	-14.6	20.78	1
DNAme Hannum CpGs	I20-I25	I20-I25 Ischaemic heart diseases	933	t	64	1.07245	0.5457	2.34505	0.00951	225	41.7	0.292	4.02	1
PEA Proteomics	C15-C26	C15-C26 Malignant neoplasms of digestive organs	742	t	13	0.702664	0.8246	1.5023	0.0665	235	24.2	0.0278	4.14	1
Horvath 2013	J40-J47	J40-J47 Chronic lower respiratory diseases	959	t	64	0.458395	0.4049	1.23851	0.108	226	39.4	0.0609	5.92	1
PEA Proteomics	J40-J47	J40-J47 Chronic lower respiratory diseases	734	t	52	0.356458	0.5887	0.74904	0.227	227	40.5	0.0677	4.16	1
Horvath 2013	I	I	869	t	235	0.401882	0.2336	1.7692	0.0384	200	67.5	0.152	5.48	1
PEA Proteomics	C64-C68	C64-C68 Malignant neoplasm of urinary tract	746	t	7	0.04594	0.887	0.11251	0.455	236	17	0.0325	4.16	1
Horvath 2013	C15-C26	C15-C26 Malignant neoplasms of digestive organs	972	t	17	0.063801	0.5895	0.1337	0.447	232	25.9	0.0357	5.93	1
MetaboAge	E	E	1698	t	215	0.109687	0.0518	2.12214	0.0169	189	55.7	-14.7	19.49	1
Horvath 2013	J20-J22	J20-J22 Other acute lower respiratory infections	969	t	26	0.375878	0.534	0.8325	0.203	232	25.6	0.0614	5.92	1
PEA Proteomics	I60-I69	I60-I69 Cerebrovascular diseases	744	t	16	0.266506	0.7802	0.54609	0.293	235	19	0.0259	4.16	1
MS Metabolomics	I26-I28	I26-I28 Pulmonary heart disease and diseases of pulmonary circulation	801	t	7	1.12461	0.8253	2.4133	0.0079	234	19.1	0.271	6.86	1
DNAme Horvath CpGs	J80-J84	J80-J84 Other respiratory diseases principally affecting the interstitium	889	t	5	0.236646	0.9133	0.63642	0.262	234	19.6	0.34	4.39	1
Clinomics	I70-I79	I70-I79 Diseases of arteries, arterioles and capillaries	1653	t	21	0.645763	0.4782	1.5376	0.0621	205	40	0.028	9	1
MS Metabolomics	C60-C63	C60-C63 Malignant neoplasms of male genital organs	798	t	6	-1.10874	0.7681	-2.26161	0.988	234	19.5	0.274	6.88	1
MS Complex Lipidomics	J09-J18	J09-J18 Influenza and pneumonia	871	t	20	0.473456	0.5593	1.0211	0.154	232	24.4	0.778	9.32	1
DNAme Hannum CpGs	C60-C63	C60-C63 Malignant neoplasms of male genital organs	955	t	7	0.308847	0.8799	0.738823	0.23	234	19.7	0.269	4.04	1
DNAme Horvath CpGs	C43-C44	C43-C44 Melanoma and other malignant neoplasms of skin	887	t	7	-0.641736	0.8901	-1.5807	0.943	233	21.8	0.342	4.39	1
NMR Metabolomics	I10-I15	I10-I15 Hypertensive diseases	1429	t	204	0.375344	0.2009	1.907	0.0283	186	56.7	0.646	9.84	1
MetaboAge	J40-J47	J40-J47 Chronic lower respiratory diseases	1735	t	95	-0.012051	0.1771	-0.06921	0.528	197	47.4	-14.8	19.32	1
GlycanAge	C60-C63	C60-C63 Malignant neoplasms of male genital organs	1773	t	12	-0.307127	0.6252	-0.62817	0.735	202	40	0.251	10.12	1
Clinomics	J60-J70	J60-J70 Lung diseases due to external agents	1659	t	12	0.616667	0.5901	1.29429	0.0978	206	38.8	-0.000917	9.02	1
MS Fatty Acid Lipidomics	J40-J47	J40-J47 Chronic lower respiratory diseases	868	t	60	-0.107778	0.3639	-0.31796	0.625	228	38.8	1.01	13.29	1
MS Fatty Acid Lipidomics	J20-J22	J20-J22 Other acute lower respiratory infections	875	t	26	-0.265341	0.4934	-0.6184	0.732	234	24.4	0.994	13.24	1
NMR Metabolomics	J90-J94	J90-J94 Other diseases of pleura	1502	t	15	0.534744	0.599	1.1139	0.133	203	39.8	0.339	9.94	1
MS Complex Lipidomics	J60-J70	J60-J70 Lung diseases due to external agents	870	t	9	-0.410796	0.7033	-0.8216	0.794	234	21.6	0.753	9.38	1
MS Fatty Acid Lipidomics	E	E	863	t	132	-0.293881	0.2476	-1.22613	0.89	216	56.3	1.03	13.33	1
MS Fatty Acid Lipidomics	I30-I52	I30-I52 Other forms of heart disease	866	t	77	0.20196	0.3032	0.6989	0.242	227	38.2	1.07	13.26	1
DNAme Hannum CpGs	J40-J47	J40-J47 Chronic lower respiratory diseases	944	t	64	0.367649	0.5388	0.80999	0.209	226	39.8	0.278	4.02	1
NMR Metabolomics	I20-I25	I20-I25 Ischaemic heart diseases	1474	t	86	0.179133	0.3012	0.62361	0.266	196	47.8	0.553	9.84	1
Clinomics	J90-J94	J90-J94 Other diseases of pleura	1656	t	15	-0.219965	0.598	-0.4584	0.677	206	38.6	0.00157	9.01	1
MS Fatty Acid Lipidomics	J80-J84	J80-J84 Other respiratory diseases principally affecting the interstitium	883	t	4	0.691243	0.7983	1.43725	0.0753	236	16.3	0.872	13.32	1
MetaboAge	J90-J94	J90-J94 Other diseases of pleura	1766	t	17	-0.004886	0.4067	-0.0132	0.505	203	39.6	-14.6	20.81	1
DEXA	C81-C96	C81-C96 Malignant neoplasm of lymphoid, haematopoietic and related tissue	1069	t	12	0.222664	0.6393	0.4527	0.325	207	34.1	0.428	10.14	1
MS Metabolomics	J60-J70	J60-J70 Lung diseases due to external agents	802	t	5	-0.601999	0.8162	-1.27652	0.899	234	19.8	0.247	6.89	1
NMR Metabolomics	E00-E07	E00-E07 Disorders of thyroid gland	1472	t	94	0.055577	0.2874	0.201923	0.42	196	49.4	0.371	9.97	1
Hannum 2013	E	E	950	t	144	-0.089429	0.3309	-0.28625	0.613	214	56.7	0.0358	4.96	1
MS Complex Lipidomics	I20-I25	I20-I25 Ischaemic heart diseases	852	t	62	-0.059292	0.3633	-0.17512	0.57	225	43.1	0.888	9.3	1
MS Metabolomics	E00-E07	E00-E07 Disorders of thyroid gland	794	t	59	-0.111062	0.4073	-0.298717	0.617	224	44.5	0.268	6.86	1
Hannum 2013	J	J	932	t	127	0.321708	0.3398	1.0068	0.157	218	50.6	0.0389	4.98	1
Clinomics	C	C	1636	t	98	-0.061061	0.2701	-0.2351	0.593	199	47.8	0.0923	8.98	1
DEXA	C76-C80	C76-C80 Malignant neoplasms of ill-defined, secondary and unspecified sites	1068	t	25	-0.003938	0.4934	-0.00918	0.504	206	35.8	0.43	10.15	1
UPLC IgG Glycomics	J40-J47	J40-J47 Chronic lower respiratory diseases	1725	t	94	0.258381	0.2763	0.97314	0.165	197	47	0.179	9.6	1
Hannum 2013	I20-I25	I20-I25 Ischaemic heart diseases	948	t	67	0.682312	0.4416	1.72245	0.0425	225	42.3	0.0157	4.93	1
Hannum 2013	I10-I15	I10-I15 Hypertensive diseases	926	t	169	0.598497	0.2869	2.1783	0.0147	210	59.6	0.0843	4.95	1
NMR Metabolomics	E10-E14	E10-E14 Diabetes mellitus	1495	t	39	1.03961	0.4318	2.6697	0.0038	200	43.7	0.374	9.93	1
MetaboAge	C30-C39	C30-C39 Malignant neoplasm of respiratory and intrathoracic organs	1770	t	5	0.163577	0.3487	0.5005	0.308	203	39.4	-14.6	20.78	1
DNAme Hannum CpGs	I05-I09	I05-I09 Chronic rheumatic heart diseases	961	t	10	0.334206	0.8345	0.7267	0.234	234	19.6	0.267	4.05	1
Hannum 2013	C81-C96	C81-C96 Malignant neoplasm of lymphoid, haematopoietic and related tissue	976	t	8	0.075999	0.8212	0.1621	0.436	233	20.9	0.0403	4.94	1
Hannum 2013	I	I	869	t	235	0.600013	0.2516	2.4626	0.0069	200	67.5	0.0533	4.87	1
UPLC IgG Glycomics	C76-C80	C76-C80 Malignant neoplasms of ill-defined, secondary and unspecified sites	1759	t	38	0.916754	0.4296	2.35964	0.00915	201	42.1	0.181	9.63	1
UPLC IgG Glycomics	I70-I79	I70-I79 Diseases of arteries, arterioles and capillaries	1753	t	23	0.072864	0.5211	0.1639	0.435	202	40.7	0.2	9.63	1
UPLC IgG Glycomics	E10-E14	E10-E14 Diabetes mellitus	1743	t	57	0.627107	0.3688	1.8292	0.0337	200	43.7	0.202	9.63	1
MetaboAge	C60-C63	C60-C63 Malignant neoplasms of male genital organs	1764	t	13	-0.34969	0.5405	-0.768063	0.779	202	40.3	-14.6	20.8	1
Hannum 2013	C	C	953	t	70	-0.04023	0.4385	-0.1023	0.541	225	42.5	0.0461	4.95	1
Hannum 2013	I05-I09	I05-I09 Chronic rheumatic heart diseases	976	t	12	1.24902	0.6123	2.5817	0.00492	234	19.7	0.0403	4.94	1
Hannum 2013	J60-J70	J60-J70 Lung diseases due to external agents	973	t	9	0.651268	0.7136	1.30282	0.0963	234	20.9	0.0357	4.95	1
PEA Proteomics	C30-C39	C30-C39 Malignant neoplasm of respiratory and intrathoracic organs	745	t	1	0.156161	0.9876	1.0068	0.157	237	13.7	0.0331	4.16	1
PEA Proteomics	ALL	ALL	632	t	246	0.31364	0.3249	1.0204	0.154	183	79.1	0.113	4.14	1
UPLC IgG Glycomics	I60-I69	I60-I69 Cerebrovascular diseases	1756	t	38	0.451405	0.4455	1.13175	0.129	201	40.8	0.198	9.62	1
Hannum 2013	C43-C44	C43-C44 Melanoma and other malignant neoplasms of skin	973	t	8	-0.507466	0.7492	-1.0223	0.847	234	21.5	0.0477	4.94	1
MS Complex Lipidomics	J40-J47	J40-J47 Chronic lower respiratory diseases	856	t	57	0.690147	0.376	1.98078	0.0238	226	39	0.857	9.35	1
Hannum 2013	I26-I28	I26-I28 Pulmonary heart disease and diseases of pulmonary circulation	974	t	10	-0.021637	0.7956	-0.0449	0.518	234	19.1	0.0482	4.94	1
Hannum 2013	I60-I69	I60-I69 Cerebrovascular diseases	974	t	22	0.416762	0.6436	0.84611	0.199	233	22.5	0.0431	4.95	1
Mega Omics	E00-E07	E00-E07 Disorders of thyroid gland	735	t	53	-0.395057	0.7389	-0.794294	0.786	226	43.9	0.111	2.78	1
DEXA	I	I	943	t	235	0.148983	0.1786	0.8475	0.198	180	61.6	1.05	10.18	1
PEA Proteomics	C81-C96	C81-C96 Malignant neoplasm of lymphoid, haematopoietic and related tissue	746	t	7	0.090584	0.8804	0.217	0.414	236	17.8	0.0325	4.16	1
Hannum 2013	E10-E14	E10-E14 Diabetes mellitus	968	t	39	-0.632752	0.5086	-1.445	0.926	229	33.3	0.0512	4.95	1
MS Complex Lipidomics	E	E	852	t	127	0.024091	0.2586	0.09614	0.462	215	56.3	0.832	9.35	1
MS Fatty Acid Lipidomics	I95-I99	I95-I99 Other and unspecified disorders of the circulatory system	882	t	13	0.7904	0.598	1.6511	0.0494	236	16.3	0.893	13.31	1
PEA Proteomics	E00-E07	E00-E07 Disorders of thyroid gland	741	t	52	0.099604	0.5859	0.209749	0.417	227	41.9	0.0459	4.16	1
Hannum 2013	J80-J84	J80-J84 Other respiratory diseases principally affecting the interstitium	976	t	5	-0.157491	0.8717	-0.36874	0.644	234	19.3	0.0403	4.94	1
NMR Metabolomics	C	C	1483	t	86	0.069696	0.297	0.2459	0.403	197	47.6	0.44	9.93	1
NMR Metabolomics	I95-I99	I95-I99 Other and unspecified disorders of the circulatory system	1502	t	17	-0.712821	0.5663	-1.5268	0.937	202	39.7	0.368	9.91	1
PEA Proteomics	C	C	728	t	49	0.264606	0.6032	0.5502	0.291	229	39	0.0617	4.13	1
Hannum 2013	E50-E64	E50-E64 Other nutritional deficiencies	976	t	7	0.811766	0.7231	1.62527	0.0521	234	19	0.0403	4.94	1
PEA Proteomics	J90-J94	J90-J94 Other diseases of pleura	744	t	5	0.41563	0.9136	1.1183	0.132	237	14.6	0.026	4.16	1
Hannum 2013	J09-J18	J09-J18 Influenza and pneumonia	974	t	24	0.524224	0.6176	1.0791	0.14	232	24.4	0.0365	4.95	1
NMR Metabolomics	J40-J47	J40-J47 Chronic lower respiratory diseases	1472	t	82	0.315678	0.303	1.09305	0.137	197	47.6	0.358	9.88	1
Hannum 2013	E00-E07	E00-E07 Disorders of thyroid gland	967	t	74	0.155243	0.4429	0.390978	0.348	224	44.7	0.0335	4.95	1
DNAme Horvath CpGs	I70-I79	I70-I79 Diseases of arteries, arterioles and capillaries	885	t	15	-0.0454	0.7912	-0.0938	0.537	232	24.6	0.339	4.39	1
Horvath 2013	I10-I15	I10-I15 Hypertensive diseases	926	t	169	0.658434	0.2474	2.746	0.00302	210	59.6	0.0879	5.95	1
MS Metabolomics	J40-J47	J40-J47 Chronic lower respiratory diseases	790	t	53	0.337697	0.4401	0.85437	0.196	226	38.4	0.349	6.84	1
UPLC IgG Glycomics	C43-C44	C43-C44 Melanoma and other malignant neoplasms of skin	1757	t	9	0.461395	0.7294	0.9242	0.178	202	39.8	0.18	9.63	1
Clinomics	C76-C80	C76-C80 Malignant neoplasms of ill-defined, secondary and unspecified sites	1659	t	34	0.208202	0.4251	0.54221	0.294	204	41.5	0.00955	9.02	1
DNAme Horvath CpGs	I10-I15	I10-I15 Hypertensive diseases	846	t	150	0.317487	0.3786	0.9063	0.182	210	59.4	0.415	4.4	1
Hannum 2013	I70-I79	I70-I79 Diseases of arteries, arterioles and capillaries	972	t	18	0.042646	0.6924	0.0855	0.466	232	24.8	0.0462	4.94	1
Hannum 2013	C76-C80	C76-C80 Malignant neoplasms of ill-defined, secondary and unspecified sites	974	t	25	0.614891	0.5852	1.29687	0.0973	231	28.1	0.0387	4.94	1
UPLC IgG Glycomics	I	I	1570	t	361	0.182005	0.1468	1.2534	0.105	177	62	0.649	9.59	1
MS Complex Lipidomics	E50-E64	E50-E64 Other nutritional deficiencies	873	t	7	-0.193967	0.7472	-0.390017	0.652	234	19.7	0.735	9.37	1
Hannum 2013	I95-I99	I95-I99 Other and unspecified disorders of the circulatory system	975	t	13	-1.36284	0.6599	-2.751	0.997	234	19.2	0.0413	4.94	1
DNAme Horvath CpGs	I26-I28	I26-I28 Pulmonary heart disease and diseases of pulmonary circulation	887	t	10	0.33658	0.8424	0.7417	0.229	234	19.5	0.351	4.39	1
Hannum 2013	C51-C58	C51-C58 Malignant neoplasms of female genital organs	974	t	7	-0.362105	0.8573	-0.8206	0.794	233	22.8	0.0415	4.94	1
Hannum 2013	C30-C39	C30-C39 Malignant neoplasm of respiratory and intrathoracic organs	975	t	3	0.124328	0.9116	0.3319	0.37	234	18.6	0.0379	4.94	1
Hannum 2013	J20-J22	J20-J22 Other acute lower respiratory infections	969	t	26	0.907703	0.5831	1.9163	0.0277	232	25.6	0.0503	4.94	1
Hannum 2013	ALL	ALL	825	t	320	0.391804	0.222	1.8098	0.0352	181	78.5	0.0358	4.9	1
PEA Proteomics	I20-I25	I20-I25 Ischaemic heart diseases	727	t	57	-0.595144	0.5563	-1.28751	0.901	226	43.1	0.0369	4.16	1
PEA Proteomics	J80-J84	J80-J84 Other respiratory diseases principally affecting the interstitium	746	t	4	0.848648	0.9515	2.89835	0.00188	237	16.4	0.0325	4.16	0.87781
DNAme Horvath CpGs	E50-E64	E50-E64 Other nutritional deficiencies	889	t	7	0.73503	0.8782	1.75049	0.04	234	19.4	0.34	4.39	1
Hannum 2013	J90-J94	J90-J94 Other diseases of pleura	974	t	10	0.428311	0.7621	0.8677	0.193	234	18.7	0.044	4.95	1
MS Complex Lipidomics	I	I	781	t	215	0.090711	0.2061	0.4496	0.326	199	68.7	1.37	9.2	1
Clinomics	J95-J99	J95-J99 Other diseases of the respiratory system	1662	t	14	-0.531295	0.5786	-1.1265	0.87	205	39.4	0.00337	9.01	1
UPLC IgG Glycomics	C81-C96	C81-C96 Malignant neoplasm of lymphoid, haematopoietic and related tissue	1762	t	13	0.202669	0.628	0.4142	0.339	202	39.7	0.166	9.63	1
MS Complex Lipidomics	I60-I69	I60-I69 Cerebrovascular diseases	872	t	19	0.440177	0.5652	0.94413	0.173	233	22.4	0.755	9.35	1
NMR Metabolomics	J09-J18	J09-J18 Influenza and pneumonia	1502	t	33	0.764776	0.4534	1.8927	0.0292	202	40.7	0.364	9.92	1
DNAme Horvath CpGs	C64-C68	C64-C68 Malignant neoplasm of urinary tract	889	t	8	0.832031	0.8663	1.92309	0.0272	234	20	0.34	4.39	1
NMR Metabolomics	E50-E64	E50-E64 Other nutritional deficiencies	1504	t	7	1.46963	0.7198	2.93213	0.00168	203	39.4	0.342	9.93	0.78942
DEXA	E10-E14	E10-E14 Diabetes mellitus	1060	t	32	-0.088597	0.4513	-0.2199	0.587	205	37.4	0.466	10.14	1
UPLC IgG Glycomics	C51-C58	C51-C58 Malignant neoplasms of female genital organs	1760	t	9	-0.38669	0.6931	-0.774	0.781	202	40.2	0.179	9.62	1
NMR Metabolomics	C76-C80	C76-C80 Malignant neoplasms of ill-defined, secondary and unspecified sites	1501	t	29	0.093121	0.4729	0.22394	0.411	201	41.7	0.358	9.93	1
MS Metabolomics	ALL	ALL	685	t	262	-0.047638	0.2196	-0.2223	0.588	183	77.7	0.62	6.81	1
Mega Omics	I05-I09	I05-I09 Chronic rheumatic heart diseases	740	t	10	0.211933	0.9278	0.6121	0.27	236	17.4	0.119	2.78	1
Mega Omics	I10-I15	I10-I15 Hypertensive diseases	706	t	128	0.329545	0.5867	0.6937	0.244	213	58.8	0.133	2.79	1
Mega Omics	J	J	706	t	95	0.425789	0.6372	0.8671	0.193	220	50.4	0.124	2.77	1
NMR Metabolomics	C15-C26	C15-C26 Malignant neoplasms of digestive organs	1500	t	18	1.35998	0.5513	2.9556	0.00156	202	40.7	0.353	9.94	0.73334
MS Complex Lipidomics	C30-C39	C30-C39 Malignant neoplasm of respiratory and intrathoracic organs	872	t	3	0.952814	0.855	2.1493	0.0158	234	19.2	0.739	9.37	1
DEXA	J40-J47	J40-J47 Chronic lower respiratory diseases	1050	t	56	0.182158	0.3573	0.54577	0.293	202	41.7	0.48	10.12	1
UPLC IgG Glycomics	J	J	1686	t	196	0.213303	0.1992	1.0927	0.137	191	52.2	0.188	9.57	1
PEA Proteomics	E50-E64	E50-E64 Other nutritional deficiencies	746	t	5	-0.042587	0.9116	-0.113743	0.545	237	15.3	0.0325	4.16	1
DNAme Horvath CpGs	C15-C26	C15-C26 Malignant neoplasms of digestive organs	885	t	15	-0.081418	0.791	-0.1681	0.567	232	25.7	0.337	4.4	1
MS Complex Lipidomics	E70-E90	E70-E90 Metabolic disorders	865	t	39	0.760209	0.4343	1.9428	0.026	229	33.5	0.776	9.34	1
MS Fatty Acid Lipidomics	C15-C26	C15-C26 Malignant neoplasms of digestive organs	878	t	15	0.693746	0.5819	1.4671	0.0712	235	23.1	0.902	13.32	1
MS Metabolomics	I70-I79	I70-I79 Diseases of arteries, arterioles and capillaries	799	t	14	0.412528	0.6922	0.8256	0.205	233	24.2	0.276	6.88	1
DNAme Hannum CpGs	J60-J70	J60-J70 Lung diseases due to external agents	958	t	9	0.387978	0.8541	0.87333	0.191	234	20.9	0.267	4.05	1
DEXA	J09-J18	J09-J18 Influenza and pneumonia	1068	t	22	0.58311	0.5357	1.2891	0.0987	207	33.7	0.443	10.13	1
MS Complex Lipidomics	C64-C68	C64-C68 Malignant neoplasm of urinary tract	873	t	9	0.697146	0.7107	1.39578	0.0814	234	21.1	0.735	9.37	1
PEA Proteomics	J95-J99	J95-J99 Other diseases of the respiratory system	746	t	9	0.446878	0.857	1.0121	0.156	236	20	0.0325	4.16	1
DNAme Horvath CpGs	I95-I99	I95-I99 Other and unspecified disorders of the circulatory system	888	t	12	0.607107	0.8127	1.2826	0.0998	234	19.2	0.346	4.39	1
DNAme Hannum CpGs	E50-E64	E50-E64 Other nutritional deficiencies	961	t	7	0.85869	0.8635	1.97273	0.0243	234	19.1	0.267	4.05	1
DNAme Hannum CpGs	I70-I79	I70-I79 Diseases of arteries, arterioles and capillaries	957	t	18	0.500442	0.7629	1.0146	0.155	232	24.8	0.264	4.04	1
MS Metabolomics	J09-J18	J09-J18 Influenza and pneumonia	801	t	16	0.713863	0.6575	1.4409	0.0748	233	24.2	0.274	6.87	1
DNAme Horvath CpGs	ALL	ALL	757	t	288	0.169328	0.2824	0.6249	0.266	183	77.9	0.485	4.35	1
NMR Metabolomics	C51-C58	C51-C58 Malignant neoplasms of female genital organs	1502	t	7	-0.128918	0.7368	-0.2587	0.602	203	40.2	0.363	9.92	1
Mega Omics	J20-J22	J20-J22 Other acute lower respiratory infections	736	t	20	0.820707	0.8783	1.9547	0.0253	234	24.8	0.141	2.77	1
GlycanAge	C	C	1753	t	101	0.632702	0.2518	2.6052	0.00459	196	47.6	0.308	10.12	1
Clinomics	J20-J22	J20-J22 Other acute lower respiratory infections	1650	t	40	0.617804	0.3876	1.7292	0.0419	204	40.3	0.00184	9	1
NMR Metabolomics	I70-I79	I70-I79 Diseases of arteries, arterioles and capillaries	1495	t	17	0.128336	0.5743	0.273	0.392	202	41.1	0.376	9.94	1
NMR Metabolomics	J60-J70	J60-J70 Lung diseases due to external agents	1502	t	11	0.12486	0.655	0.25229	0.4	203	39.7	0.341	9.94	1
MS Complex Lipidomics	E10-E14	E10-E14 Diabetes mellitus	867	t	36	-0.560896	0.448	-1.4001	0.919	229	34.4	0.782	9.36	1
UPLC IgG Glycomics	J60-J70	J60-J70 Lung diseases due to external agents	1760	t	12	0.80109	0.6501	1.62158	0.0524	203	39.3	0.166	9.63	1
UPLC IgG Glycomics	E	E	1691	t	217	0.205595	0.1919	1.08625	0.139	188	55.7	0.258	9.59	1
MetaboAge	I10-I15	I10-I15 Hypertensive diseases	1681	t	247	0.109852	0.055	2.005	0.0225	186	56.7	-14.3	21.15	1
PEA Proteomics	I30-I52	I30-I52 Other forms of heart disease	733	t	69	0.015585	0.5056	0.0357	0.486	227	38.2	0.071	4.12	1
DEXA	E00-E07	E00-E07 Disorders of thyroid gland	1050	t	75	0.022734	0.3133	0.076664	0.469	200	46.1	0.443	10.15	1
