# Supplementary material for: A catalogue of omics biological ageing clocks reveals substantial commonality and associations with disease risk
Source: Aging (Albany NY). 2022 Jan 24;14(2):623–59. doi: 10.18632/aging.203847 (PMC8833109; doi:10.18632/aging.203847)
Supplement: Supplementary Table 6 [file aging-14-203847-s008.xlsx]

## Sheet: STX
Supplementary Table 6. Sex stratified standardised OCAA-disease block associations.
Clock: omics clock OCAA
Outcome: disease block ICD10 code
m_beta: standardised effect size for association in males
m_se: standard error of standardised effect size estimate in males
m_p: p-value of OCAA-disease block association in males
m_q: 10% FDR (one-sided) q-value in males
m_n: sample size in males
f_beta: standardised effect size for association in females
f_se: standard error of standardised effect size estimate in females
f_p: p-value of OCAA-disease block association in females
f_q: 10% FDR (one-sided) q-value in females
f_n: sample size in females
concordance: concordance of effect direction across sexes
t.tet_p: for those associations where the effect directions were discordant, the two-sided T-test p-value for differences between effect sizes across sexes
Clock	Outcome	m_beta	m_se	m_p	m_q	m_n	f_beta	f_se	f_p	f_q	f_n	concordance	t.test_p
Mega Omics	E70-E90 Metabolic disorders	0.157562	0.1792	0.104	1	311	0.16	0.1709	0.099606	1	423	conc	NA
Mega Omics	I	0.210726	0.1035	0.0126	1	283	0.017	0.1041	0.428922	1	382	conc	NA
Mega Omics	J09-J18 Influenza and pneumonia	0.296176	0.1934	0.00782	1	315	0.218	0.2142	0.024428	1	424	conc	NA
Mega Omics	J20-J22 Other acute lower respiratory infections	0.2228	0.194	0.0345	1	312	0.105	0.2079	0.181174	1	424	conc	NA
DEXA	E70-E90 Metabolic disorders	0.194007	0.2135	0.0403	1	415	0.193	0.1958	0.056381	1	636	conc	NA
DEXA	I20-I25 Ischaemic heart diseases	0.258375	0.1781	0.0194	1	413	0.105	0.1795	0.199343	1	637	conc	NA
DEXA	I30-I52 Other forms of heart disease	0.193925	0.1694	0.0598	1	413	0.152	0.167	0.110047	1	637	conc	NA
DEXA	J80-J84 Other respiratory diseases principally affecting the interstitium	0.127897	0.2435	0.0103	1	424	0.0145	0.2387	0.418895	1	645	conc	NA
GlycanAge	ALL	0.070992	0.0981	0.216	1	570	0.133	0.0717	0.026592	1	918	conc	NA
GlycanAge	C	0.20734	0.1635	0.0471	1	681	0.224	0.1341	0.023914	1	1072	conc	NA
GlycanAge	C76-C80 Malignant neoplasms of ill-defined, secondary and unspecified sites	0.126193	0.1986	0.148	1	696	0.281	0.1764	0.012327	1	1081	conc	NA
GlycanAge	E70-E90 Metabolic disorders	-0.061698	0.1918	0.692	1	686	0.32	0.1505	0.003926	1	1072	dis	0.682072
GlycanAge	I	0.071538	0.1067	0.229	1	610	0.115	0.0847	0.074633	1	975	conc	NA
GlycanAge	I30-I52 Other forms of heart disease	0.161012	0.1496	0.09	1	677	0.132	0.1347	0.122597	1	1071	conc	NA
GlycanAge	J09-J18 Influenza and pneumonia	0.204782	0.1921	0.0476	1	696	0.167	0.1928	0.086732	1	1082	conc	NA
GlycanAge	J80-J84 Other respiratory diseases principally affecting the interstitium	0.030317	0.2317	0.364	1	698	0.303	0.2131	0.003257	1	1082	conc	NA
DNAme Hannum CpGs	ALL	0.15724	0.0811	0.0202	1	348	0.0387	0.0735	0.290961	1	464	conc	NA
DNAme Hannum CpGs	E	0.245568	0.1171	0.00883	1	410	0.0278	0.0959	0.376916	1	526	conc	NA
DNAme Hannum CpGs	I	0.33477	0.09	3.36e-05	0.01006	371	0.0256	0.0845	0.373526	1	485	conc	NA
DNAme Hannum CpGs	I10-I15 Hypertensive diseases	0.31634	0.101	0.000304	0.09043	400	0.0579	0.0948	0.254691	1	512	conc	NA
DNAme Hannum CpGs	I20-I25 Ischaemic heart diseases	0.304546	0.1321	0.00331	0.95543	401	0.0699	0.1554	0.282659	1	532	conc	NA
DNAme Hannum CpGs	I30-I52 Other forms of heart disease	0.234856	0.1172	0.0116	1	406	0.0635	0.1341	0.287385	1	536	conc	NA
DNAme Hannum CpGs	J09-J18 Influenza and pneumonia	0.211163	0.1825	0.0452	1	418	0.341	0.1778	0.003213	1	541	conc	NA
DNAme Hannum CpGs	J20-J22 Other acute lower respiratory infections	0.152384	0.1882	0.109	1	413	0.203	0.1799	0.051699	1	541	conc	NA
Hannum 2013	ALL	0.10352	0.0736	0.0705	1	355	0.0689	0.0729	0.16077	1	470	conc	NA
Hannum 2013	I	0.215831	0.0767	0.00156	0.46044	378	0.0544	0.0878	0.254107	1	491	conc	NA
Hannum 2013	I10-I15 Hypertensive diseases	0.230417	0.0844	0.00186	0.54308	408	0.0176	0.1019	0.42489	1	518	conc	NA
Hannum 2013	I20-I25 Ischaemic heart diseases	0.293443	0.1128	0.00176	0.51633	409	-0.0917	0.159	0.772233	1	539	dis	0.682072
Hannum 2013	J20-J22 Other acute lower respiratory infections	0.255432	0.1641	0.0195	1	421	0.063	0.1862	0.306148	1	548	conc	NA
DNAme Horvath CpGs	E	0.305169	0.1189	0.00177	0.51908	383	0.0498	0.1053	0.301358	1	482	conc	NA
DNAme Horvath CpGs	E10-E14 Diabetes mellitus	0.336858	0.1574	0.00292	0.84766	391	-0.0272	0.1825	0.586169	1	491	dis	0.682072
DNAme Horvath CpGs	E70-E90 Metabolic disorders	0.214837	0.1682	0.0421	1	384	0.112	0.168	0.18406	1	495	conc	NA
DNAme Horvath CpGs	I20-I25 Ischaemic heart diseases	0.182288	0.1387	0.0571	1	377	0.112	0.1709	0.184907	1	488	conc	NA
DNAme Horvath CpGs	J	0.256968	0.1213	0.00766	1	373	0.0607	0.1177	0.279307	1	477	conc	NA
DNAme Horvath CpGs	J09-J18 Influenza and pneumonia	0.234988	0.1847	0.0295	1	391	0.306	0.2095	0.003693	1	496	conc	NA
DNAme Horvath CpGs	J20-J22 Other acute lower respiratory infections	0.265196	0.1931	0.0155	1	386	0.332	0.2044	0.002386	0.8039	496	conc	NA
Horvath 2013	ALL	0.07026	0.0778	0.171	1	355	0.131	0.0749	0.033093	1	470	conc	NA
Horvath 2013	I	0.11359	0.0839	0.0754	1	378	0.105	0.0896	0.104368	1	491	conc	NA
Horvath 2013	I10-I15 Hypertensive diseases	0.176909	0.0988	0.0254	1	408	0.191	0.1002	0.018777	1	518	conc	NA
Horvath 2013	J	0.23896	0.1201	0.0115	1	405	0.0706	0.11	0.237335	1	527	conc	NA
UPLC IgG Glycomics	ALL	0.055581	0.1012	0.274	1	564	0.167	0.0682	0.005483	1	910	conc	NA
UPLC IgG Glycomics	C76-C80 Malignant neoplasms of ill-defined, secondary and unspecified sites	0.182797	0.2147	0.0481	1	687	0.25	0.1805	0.022678	1	1072	conc	NA
UPLC IgG Glycomics	E10-E14 Diabetes mellitus	0.11948	0.1889	0.167	1	682	0.194	0.1791	0.060727	1	1061	conc	NA
UPLC IgG Glycomics	E70-E90 Metabolic disorders	-0.137483	0.1998	0.874	1	677	0.396	0.1577	0.000615	0.2103	1063	dis	0.682072
UPLC IgG Glycomics	I30-I52 Other forms of heart disease	0.149825	0.1566	0.11	1	669	0.202	0.1365	0.038341	1	1062	conc	NA
UPLC IgG Glycomics	I95-I99 Other and unspecified disorders of the circulatory system	0.100044	0.2194	0.171	1	689	0.181	0.2152	0.0488	1	1072	conc	NA
UPLC IgG Glycomics	J09-J18 Influenza and pneumonia	0.190015	0.2018	0.0553	1	688	0.125	0.2014	0.148155	1	1073	conc	NA
UPLC IgG Glycomics	J80-J84 Other respiratory diseases principally affecting the interstitium	0.09405	0.2381	0.0973	1	689	0.168	0.2275	0.037713	1	1073	conc	NA
MS Fatty Acid Lipidomics	C	0.105956	0.207	0.181	1	372	0.194	0.1989	0.05308	1	492	conc	NA
MS Fatty Acid Lipidomics	I60-I69 Cerebrovascular diseases	0.239847	0.2292	0.00438	1	386	0.0473	0.2247	0.315994	1	496	conc	NA
MS Fatty Acid Lipidomics	I95-I99 Other and unspecified disorders of the circulatory system	0.207957	0.228	0.0131	1	385	-0.0125	0.2436	0.589609	1	497	dis	0.682072
MS Fatty Acid Lipidomics	J09-J18 Influenza and pneumonia	0.130594	0.2286	0.079	1	385	0.167	0.2241	0.046472	1	497	conc	NA
MS Complex Lipidomics	C	0.140913	0.1817	0.13	1	369	0.272	0.1757	0.01486	1	483	conc	NA
MS Complex Lipidomics	E70-E90 Metabolic disorders	0.02753	0.2011	0.409	1	377	0.3	0.1894	0.007747	1	488	conc	NA
MS Complex Lipidomics	I30-I52 Other forms of heart disease	0.158121	0.1632	0.1	1	371	0.182	0.1753	0.07221	1	484	conc	NA
MS Complex Lipidomics	I95-I99 Other and unspecified disorders of the circulatory system	0.222736	0.2239	0.0128	1	383	0.0919	0.2397	0.088239	1	489	conc	NA
MS Metabolomics	E70-E90 Metabolic disorders	0.104413	0.191	0.199	1	332	0.195	0.1879	0.05734	1	463	conc	NA
MS Metabolomics	I10-I15 Hypertensive diseases	0.091457	0.1241	0.198	1	326	0.238	0.1317	0.016702	1	441	conc	NA
MS Metabolomics	I30-I52 Other forms of heart disease	0.189021	0.1614	0.0628	1	329	0.138	0.1712	0.134296	1	460	conc	NA
MetaboAge	E	0.20823	0.1509	0.0418	1	673	0.0906	0.0692	0.086594	1	1025	conc	NA
MetaboAge	E10-E14 Diabetes mellitus	0.276428	0.1913	0.0123	1	688	0.212	0.0821	0.003172	1	1064	conc	NA
MetaboAge	I10-I15 Hypertensive diseases	0.017356	0.1277	0.437	1	656	0.158	0.0626	0.004579	1	1025	conc	NA
NMR Metabolomics	E	0.057164	0.158	0.32	1	581	0.279	0.116	0.003314	1	865	conc	NA
NMR Metabolomics	E10-E14 Diabetes mellitus	0.295676	0.1985	0.00714	1	596	0.131	0.2037	0.133478	1	899	conc	NA
NMR Metabolomics	I10-I15 Hypertensive diseases	-0.060654	0.1299	0.707	1	566	0.301	0.1192	0.002003	0.677	863	dis	0.682072
NMR Metabolomics	J09-J18 Influenza and pneumonia	0.253163	0.2024	0.0166	1	598	0.00696	0.209	0.475791	1	904	conc	NA
NMR Metabolomics	J80-J84 Other respiratory diseases principally affecting the interstitium	0.117153	0.241	0.0337	1	600	0.304	0.228	0.000575	0.1972	904	conc	NA
Clinomics	ALL	0.003332	0.0803	0.483	1	546	0.189	0.0755	0.004361	1	842	conc	NA
Clinomics	E	0.353448	0.1155	0.000272	0.08094	650	0.168	0.102	0.036006	1	952	conc	NA
Clinomics	E10-E14 Diabetes mellitus	0.486327	0.1515	2.61e-05	0.00784	664	0.272	0.1832	0.014455	1	986	conc	NA
Clinomics	E70-E90 Metabolic disorders	0.303862	0.1607	0.00689	1	657	0.195	0.1586	0.055895	1	983	conc	NA
Clinomics	I	0.010632	0.0873	0.448	1	586	0.204	0.0867	0.006028	1	891	conc	NA
Clinomics	I10-I15 Hypertensive diseases	0.21472	0.1	0.00935	1	632	0.309	0.096	0.00025	0.0861	945	conc	NA
Clinomics	I20-I25 Ischaemic heart diseases	0.239003	0.1286	0.015	1	647	0.155	0.1566	0.10208	1	978	conc	NA
Clinomics	J	0.053692	0.1154	0.3	1	631	0.247	0.1141	0.007545	1	955	conc	NA
Clinomics	J20-J22 Other acute lower respiratory infections	0.242779	0.1818	0.0257	1	661	0.0546	0.1846	0.330621	1	989	conc	NA
Clinomics	J80-J84 Other respiratory diseases principally affecting the interstitium	0.126628	0.2238	0.102	1	670	0.179	0.2225	0.039249	1	992	conc	NA
PEA Proteomics	J80-J84 Other respiratory diseases principally affecting the interstitium	0.142223	0.2389	0.0218	1	333	0.129	0.2425	0.014069	1	413	conc	NA
